# Supplementary material
Source: PubMed Central journal article supplement (PMC7598052)
Supplement: jci-130-127916-s417.pdf [file jci-130-127916-s417.pdf]

# Supplementary materials

## Supplementary Text

Figs. S1 to S19,

Table S1 to S8,

Data set 1

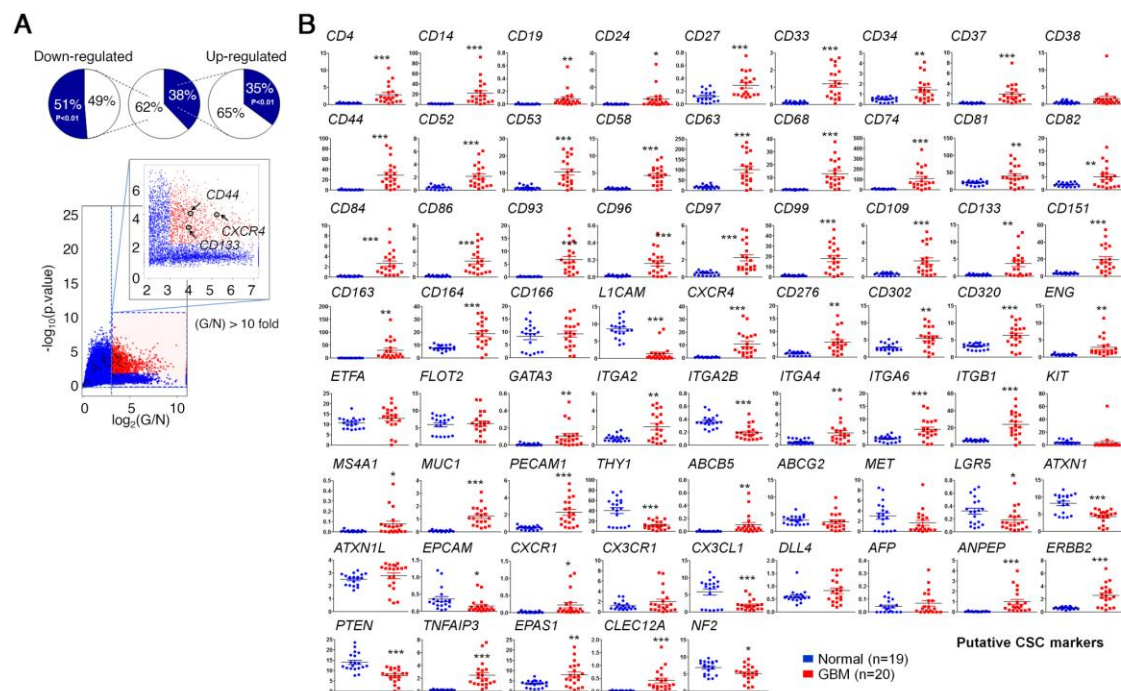

**Fig. S1. Differential expression of known 69 tumor initiating genes in human normal brain and GBM tissue samples. (A) RNA sequencing analysis. (Upper) Venn diagram representing the number of transcripts (FPKM > 1) up- or down-regulated in human glioblastoma patient samples. (lower) Volcano plots displaying differentially**

expressed genes. G/N, mean values derived from 20 human glioblastoma, G, samples divided by values from 19 human normal, N, brain tissues. In plot, red dots denote genes that undergo a statistically significant 10-fold change in G/N, either up or down ( $P < 0.01$ ). Red-labeled dots have G/N ratios greater than 10-fold higher. Blue dot-labeled genes have G/N ratios between 2 to 10. (B) Data are shown as mean  $\pm$  standard deviation for at least 19 independent specimens. Data are mean  $\pm$  SD.  $P$  value by unpaired 2-tailed Student's  $t$  test

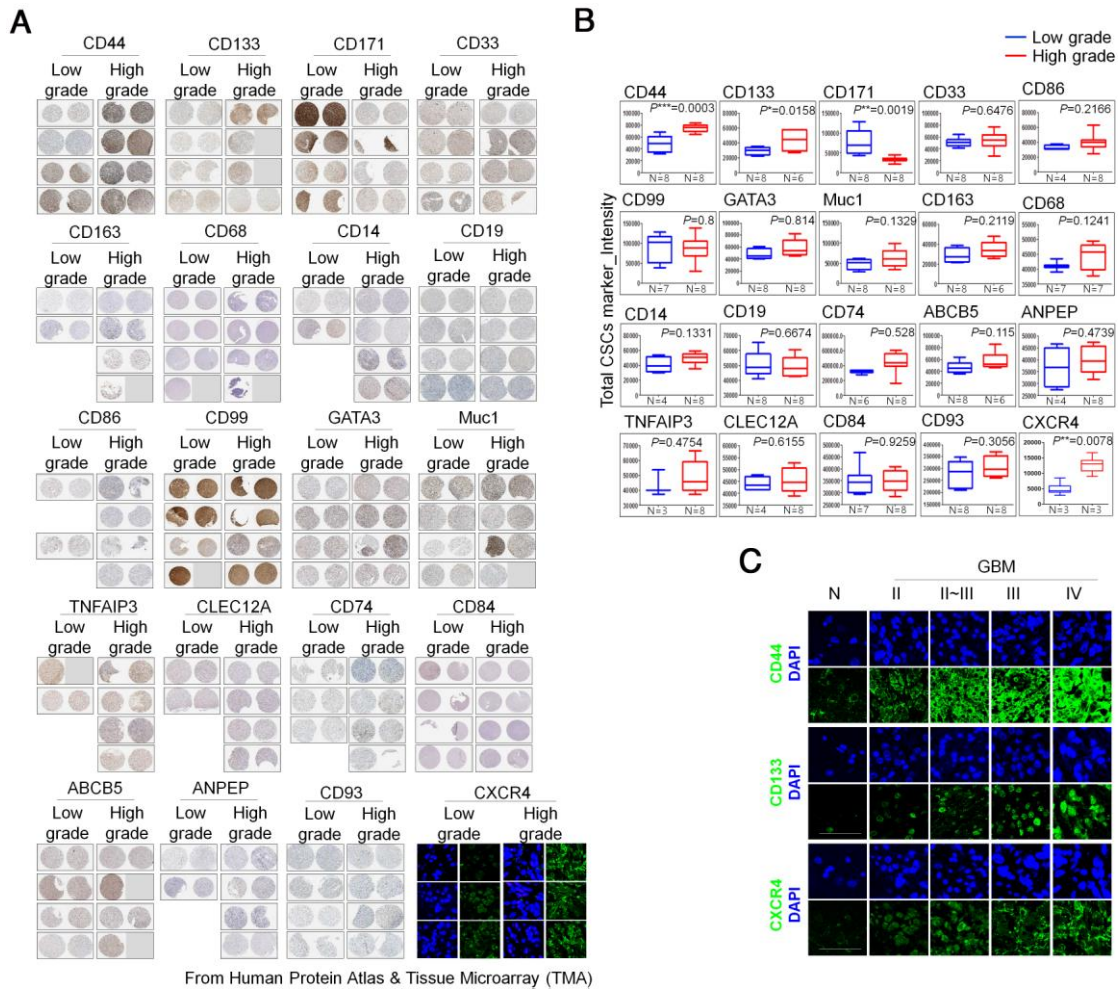

**Fig. S2. High grade glioma exhibits high CD133 and CD44 markers expression.**

(A) Low- and high- grade glioma tissue images stained with indicated antibodies were supported by the Human protein atlas (<http://www.proteinatlas.org/>) or obtained by staining of tissue microarray paraffin sections with CXCR4 antibody (last Panel). (B) Images in fig. S2A were quantified by Image J software. Data are mean  $\pm$  SD (N>3). *P* value by unpaired 2-tailed Student's *t* test. (C) Tissue microarray paraffin sections from human glioblastoma tissues and normal brain tissues were subjected to immunofluorescent staining using antibodies against CXCR4, CD44, or CD133. Cells

were counter stained with DAPI. Images were captured using a Zeiss confocal microscope. Representative images were selected from at least three different fields.

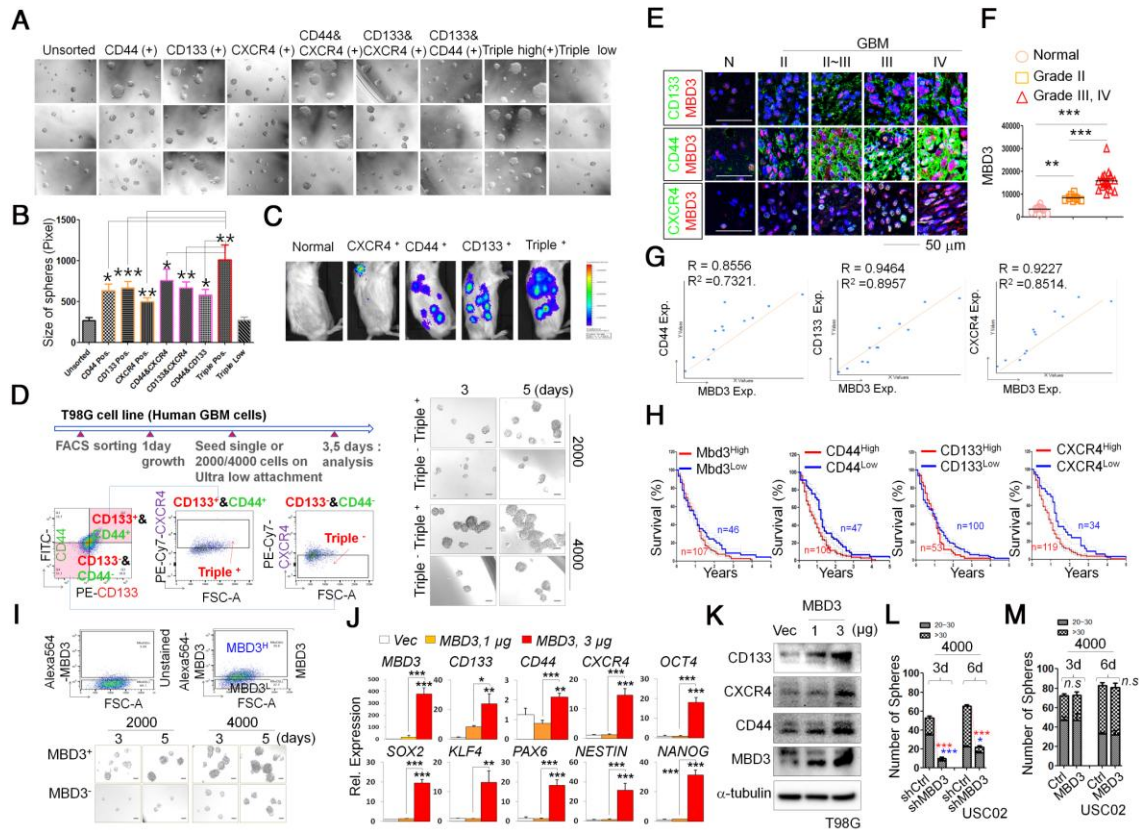

**Fig. S3. Effect of MBD3 on self-renewal capacity of CD44, CD133, and CXCR4 triple high population.** (A) CD44, CD133 and CXCR4 single, double, and triple- high or - low cells were sorted from dissociated sphere cells at a purity of 99.8% by FACS were seeded at a density of  $5 \times 10^3$  cells/plate in ultra-low attachment 96-well plates for 5 days to allow sphere formation. (B) Relative sizes of SPs in fig. S3A were measured and quantified by Image J software. Data are mean  $\pm$  SD (N>3). *P* value by One-way

ANOVA (Tukey's Multiple Comparison) test. (C) Cells from the indicated populations were injected into immunocompromised mice. After 1 weeks, bioluminescence imaging was used to monitor the initiation of tumor. (D) CD44, CD133 and CXCR4 triple positive or - negative cells were sorted from dissociated sphere cells at a purity of 99.8% by FACS were seeded as a density of  $2 \times 10^3$  (N = 5) or  $4 \times 10^3$  (N = 5) cells/well in ultra-low attachment 96-well plates for 1, 3 or 5 days to allow sphere formation. (E and F) Tissue microarray paraffin sections from human glioblastoma tissues (Stage II, N=8; II~III, N=8; III, N=8 and IV, N=8) and normal brain tissues (n=8) were subjected to immunofluorescent staining using antibodies against MBD3, CXCR4, CD44, or CD133. Cells were counter stained with DAPI. Images were captured using a Zeiss confocal microscope. Representative images were selected from at least three different fields. (G) Pearson correlation coefficient calculation of between Mbd3 and CSC markers expression from fig. S3E. (H) Kaplan–Meier plots showing survival rate by each transcripts expression level including *MBD3*, *CD44*, *CD133*, and *CXCR4* in GBM tumors of 153 patients from the Human Pathology Atlas (<https://www.proteinatlas.org/>). (I) MBD3 high or - low cells were sorted from T98G cells at a purity of 99.8% by FACS were seeded at single cell and a density of  $2 \times 10^3$  (N = 5) or  $4 \times 10^3$  (N = 5) cells/plate in ultra-low attachment 96-well plates for 1, 3 or 5

days to allow sphere formation. (Right) Representative images of SPs. Images were visualized using Zeiss fluorescence microscopy. Scale bar = 25  $\mu\text{m}$ . (**J, K**) T98G cells were electroporated with 1 or 3  $\mu\text{g}$  pUltra-Mbd3-Myc, and pUltra-control vectors using Amaxa Nucleofector and were grown on ultra-low attachment 96-well plates for up to 6 days. whole cell lysate was prepared for RT-qPCR (Fig. 3J) or immunoblotting (Fig. 3K). Data are mean  $\pm$  SD (N=3 or 4). P value by One-way ANOVA (Tukey's Multiple Comparison) test. (**L, M**) USC02 GSCs infected by pUltra-Mbd3-Myc, pUltra-control, sh-scramble or shMBD3 lentivirus were seeded on ultra-low attachment 96-well plates and measured sphere sizes at the 3 or 6 days. Data are mean  $\pm$  SD (N>3). P value by One-way ANOVA (Tukey's Multiple Comparison) test.

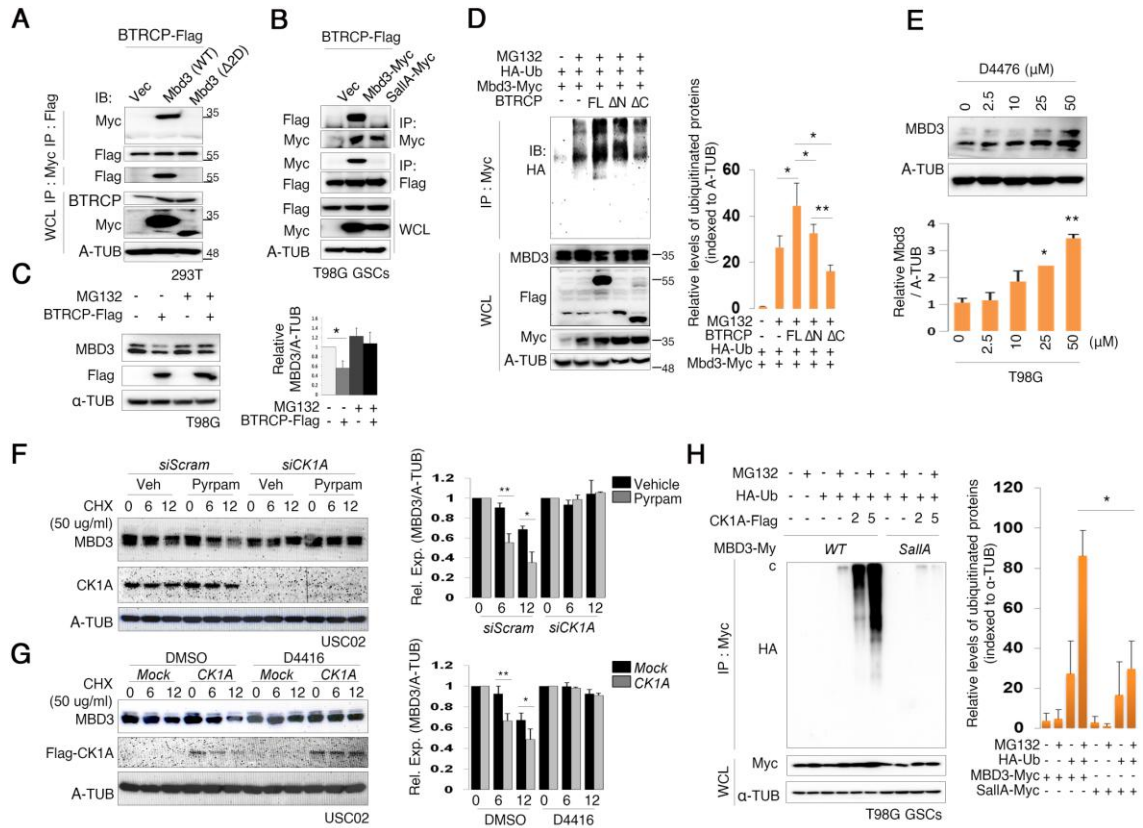

**Fig. S4.  $\beta$ -TrCP is E3 ubiquitin ligase for Mbd3 polyubiquitination and proteasomal degradation.** (A) Immunoprecipitation (IP) using Flag or Myc conjugated beads from lysates with  $\beta$ -TrCP-Flag plus control vector, wild-type Mbd3-Myc or mutant Mbd3 ( $\Delta$ 2D)-Myc. WCLs were subjected to immunoblotting using indicated antibodies. (B) IP using Myc- or Flag-conjugated beads from lysates transfected with  $\beta$ -TrCP-Flag plus control vector, wild type Mbd3-myc or mutant Mbd3 (S39,45,85,106A)-Myc. WCLs were subjected to immunoblotting using indicated antibodies. (C) (Upper) IB analysis of Mbd3, Flag and  $\alpha$ -tubulin in lysates of HEK293 cells transfected with an empty or Flag-tagged  $\beta$ -TrCP vector and treated with or without MG132. (Lower)

Quantification of band intensity in (upper panel) using Image J software. **(D)** Quantification of Fig. 2N. Data are mean  $\pm$  SD (N=3). *P* value by One-way ANOVA (Tukey's Multiple Comparison) test. **(E)** Lysates of T98G GSCs transfected with Flag-tagged full-length or mutant  $\beta$ -TrCP vectors with Mbd3-Myc vector were immunoprecipitated with indicated beads recognizing Myc. WCLs were immunoblotted **(IB)** with indicated antibodies. **(Right)** Quantification of polyubiquitylated Mbd3 normalized to  $\alpha$ -tubulin. Data are mean  $\pm$  SD (N=3). *P* value by One-way ANOVA (Tukey's Multiple Comparison) test. **(F)** (upper) Representative IB showing that the CK1 $\alpha$  inhibitor D4476 increases Mbd3 protein abundance in a dose-dependent manner. (lower) Quantification of upper panel blots. Data are mean  $\pm$  SD (N=3). *P* value by One-way ANOVA (Tukey's Multiple Comparison) test. **(G)** Effect of CK1 $\alpha$  activation on Mbd3 polyubiquitylation. T98G GSCs were transfected with indicated vectors and WCLs were then immunoprecipitated with indicated beads recognizing Myc. Data are mean  $\pm$  SD (N=3). *P* value by One-way ANOVA (Tukey's Multiple Comparison) test. **(H)** T98G GSCs were transfected with wild type Mbd3-Myc or mutant (S39,45,85,106A, Salla)-Myc and HA-Ub expression vectors plus increasing levels of Flag-tagged CK1 $\alpha$  vector and treated one day later with MG132 for 6 hours before harvest. After lysis, IP was performed with Flag-M2 beads. WCLs were analyzed by IB



with indicated antibodies. **(I)** USC02 GSCs were transfected with control or CK1 $\alpha$  shRNA and treated with DMSO or pyrpa (2  $\mu$ M) and cycloheximide (CHX) for indicated times (h=hours) before harvest. WCLs were immunoblotted (IB) with indicated antibodies. (right) Quantification of MBD3 normalized to  $\alpha$ -tubulin. Data are mean  $\pm$  SD (N=3). *P* value by One-way ANOVA (Tukey's Multiple Comparison) test.

**(J)** USC02 GSCs were transfected with pcDNA3.1-Empty or pcDNA3.1-CK1 $\alpha$  and treated with DMSO or CK1 $\alpha$  inhibitor, D4416 (10  $\mu$ M) and cycloheximide (CHX) for indicated times (h=hours) before harvest. WCLs were immunoblotted (IB) with indicated antibodies. (right) Data are mean  $\pm$  SD (N=3). *P* value by One-way ANOVA (Tukey's Multiple Comparison) test.

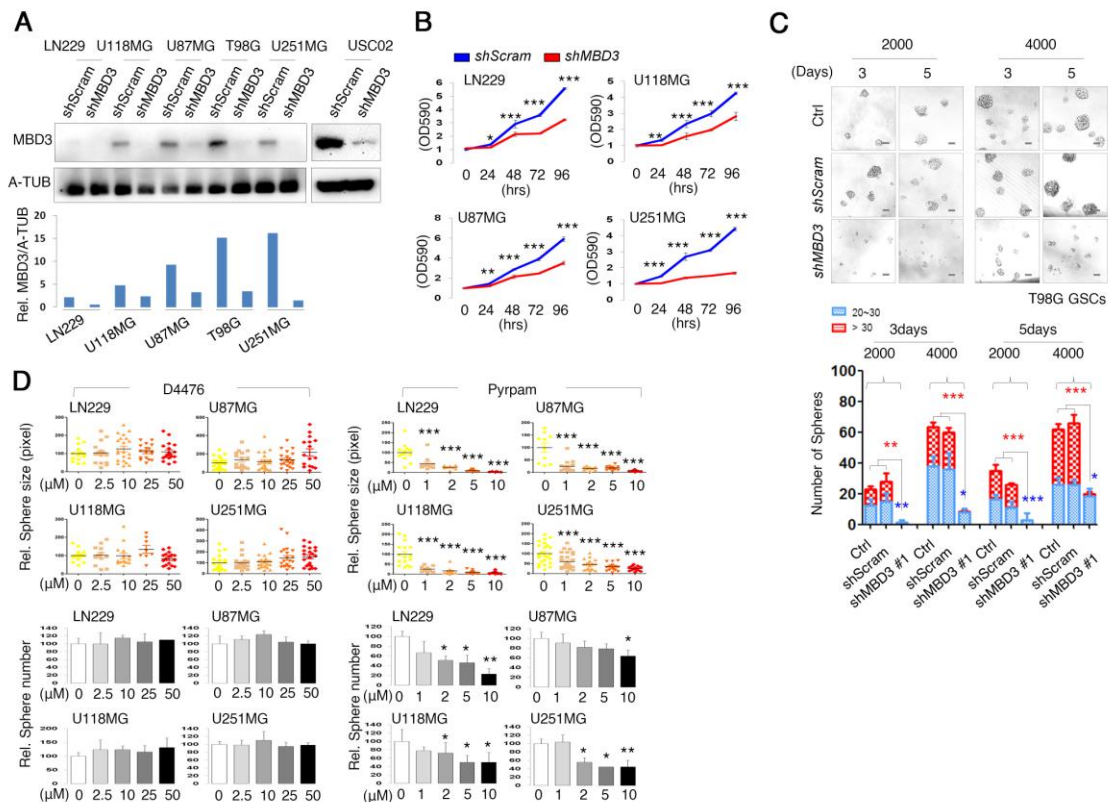

**Fig. S5. Effect of Mbd3 knockdown in proliferation and self-renewal activity of**

**GBM cells.** (A) GBM cell lines were infected by pLKO3G-shMbd3 #1 and #2 lentiviral

vectors and shcontrol or shMbd3 knockdown stable GBM cells were subjected to

immunoblotting analysis with indicated antibodies. (Lower) Mbd3 levels in (A, upper)

were normalized to  $\alpha$ -tubulin. (B and C) GBM cells infected by sh-scramble or shMbd3

lentivirus were seeded on 6-well plates and assayed for colony formation. Foci were

photographed (B) and quantified (C). Data are mean  $\pm$  SD (N=3). *P* value by One-way

ANOVA (Tukey's Multiple Comparison) test. (D) Proliferation of shcontrol or shMbd3

knockdown stable GBM cells were quantified using an MTT assay. Data are mean  $\pm$  SD

(N>3). *P* value by One-way ANOVA (Tukey's Multiple Comparison) test. (**E**, upper) Naïve, shcontrol or shMbd3 knockdown T98G-GSCs were seeded at a density of  $2 \times 10^3$  (N = 5) or  $4 \times 10^3$  (N = 5) cells/plate in ultra-low attachment 96-well plates for 1, 3 or 5 days to allow sphere formation. (**E**, lower) Relative sizes and number of spheres shown in upper panels were quantified using Image J software. Data are mean  $\pm$  SD (N>3). *P* value by One-way ANOVA (Tukey's Multiple Comparison) test. (**F** and **G**) GBM cells were seeded at a density of  $2 \times 10^4$  cells/plate in ultra-low attachment 96-well plates and then treated with indicated concentration of D4476 or Pypam for 3 days to allow sphere formation. Relative size or number of spheres of each group were measured by Image J software. Data are mean  $\pm$  SD (N>8). *P* value by One-way ANOVA (Tukey's Multiple Comparison) test.

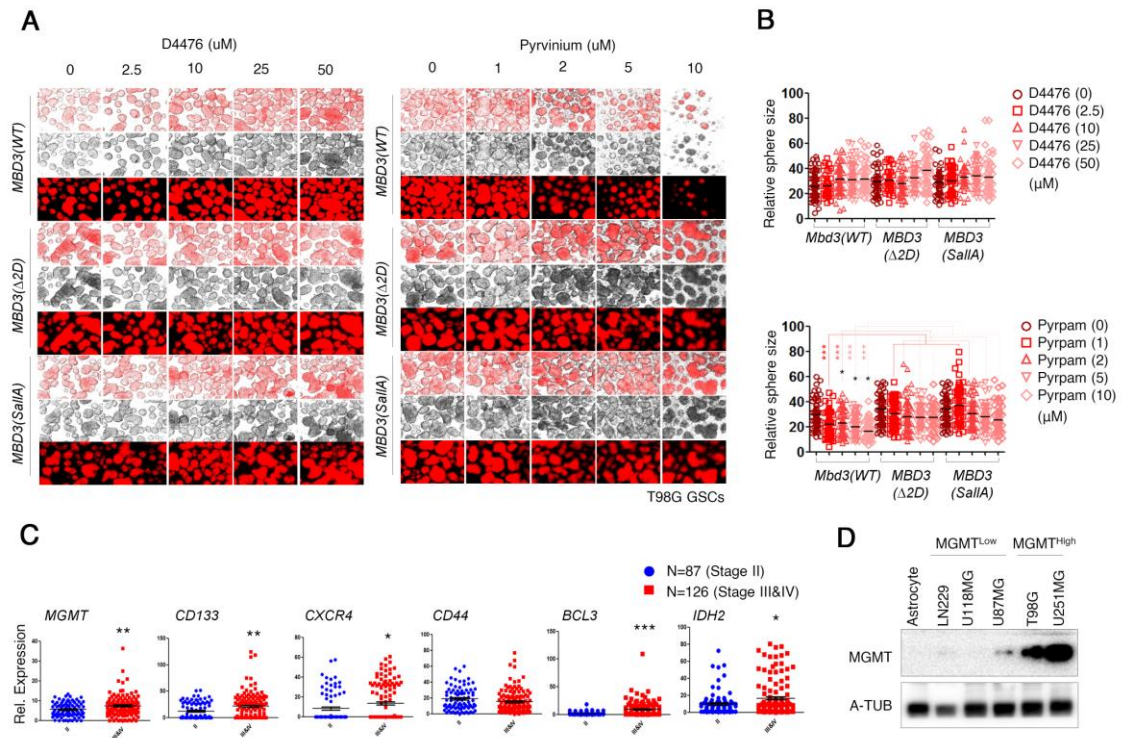

**Fig. S6. Effect of Pyrvinium pamoate in proliferation and self-renewal activity of GBM cells.** (A and B) (upper) T98G GSCs depleted by shMbd3 were infected by Wild-type (WT) Mbd3 or mutant forms ( $\Delta 2D$  and S39/45/85/106A labeled as SallA)-mcherry lentivirus and then Mbd3 (WT), ( $\Delta 2D$ ), and (SallA) T98G GSCs expressing mCherry were sorted by FACS. Each cell was seeded at a density of  $2 \times 10^4$  cells/plate in ultra-low attachment 96-well plates and then treated with indicated concentration of D4476 or Pyrpyam for 3 days to allow sphere formation. (Lower) Relative size of SP of each group were measured by Image J software. Data are mean  $\pm$  SD ( $N > 3$ ).  $P$  value by One-way ANOVA (Tukey's Multiple Comparison) test. (C) Analysis of RNA sequencing data set which are consist of 272 patients' samples containing different stages of gliomas (stage

II, N = 87; stage III, N = 47; stage IV, N = 79). Data are mean  $\pm$  SD. *P* value by One way ANOVA (Tukey's Multiple Comparison) test. (D) Immunoblotting analysis with indicated antibodies.

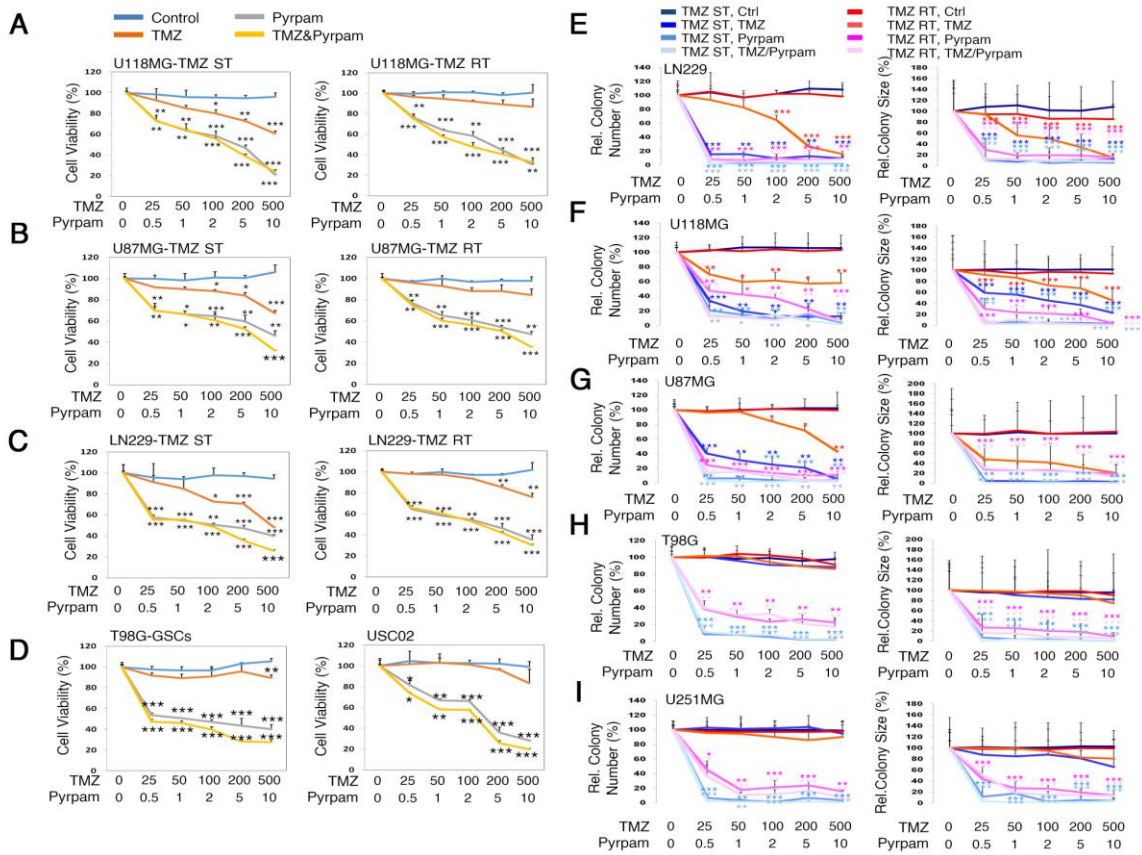

**Fig. S7. Effects of Pyrpa on temozolomide (TMZ)-sensitive and -resistant GBM cells. (A-D)** TMZ-sensitive (ST) and -resistant (RT) GBM or GSCs were treated with varying dose of TMZ, Pyrpa or their combination for 48 hours, and proliferation was quantified using a MTT assay. Data are mean  $\pm$  SD (N>3). *P* value by One-way ANOVA (Tukey's Multiple Comparison) test. **(E-I)** TMZ ST- or RT GBM or GSCs

were seeded on 6-well plates and assayed for colony formation. Drug were treated with varying dose of TMZ, Pyr pam or their combination for 48 hours, and then cultured for another 10 to 12 days in fresh medium. The number or size of colony was quantified using image J software. Data are mean  $\pm$  SD (N=3). *P* value by One-way ANOVA (Tukey's Multiple Comparison) test.

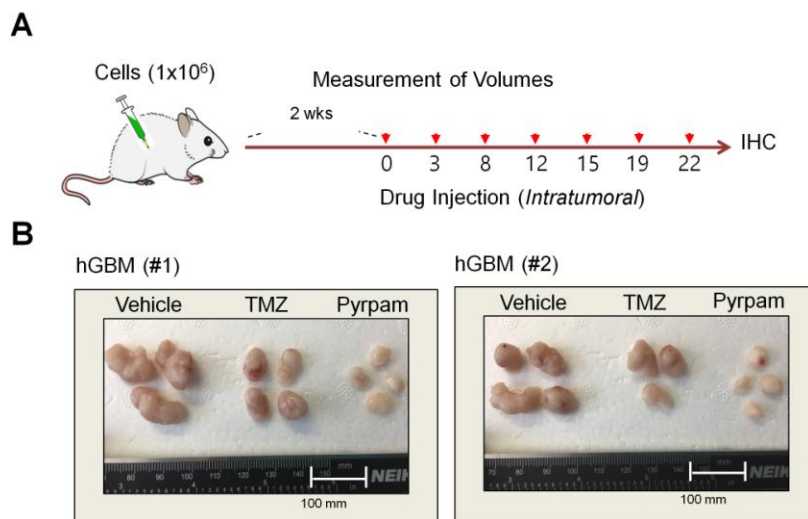

**Fig. S8. Mbd3 Loss or destabilization by CK1 $\alpha$ - $\beta$ -TrCP-Mbd3 signaling activation inhibits progression of TMZ-resistant GSCs or GBM with high MGMT expression.**

(A and B) Qualitative results of Fig. 5, E and G. Images were captured using a Zeiss confocal microscope. Representative images were selected from at least 3 different fields. (C) (upper) Schematic showing injection of GBM cells in Fig. 5L experiment. Human primary GBM cells ( $1 \times 10^6$ ) in 200  $\mu$ L phosphate-buffered saline/Matrigel (1:1) were subcutaneously (s.c.) injected into the dorsal flank of immunocompromised mice

mice (N=3 or 4 per group). (Lower) Images of tumors isolated from immunocompromised mice injected with two different human primary GBM cells. Scale bar = 100 mm.

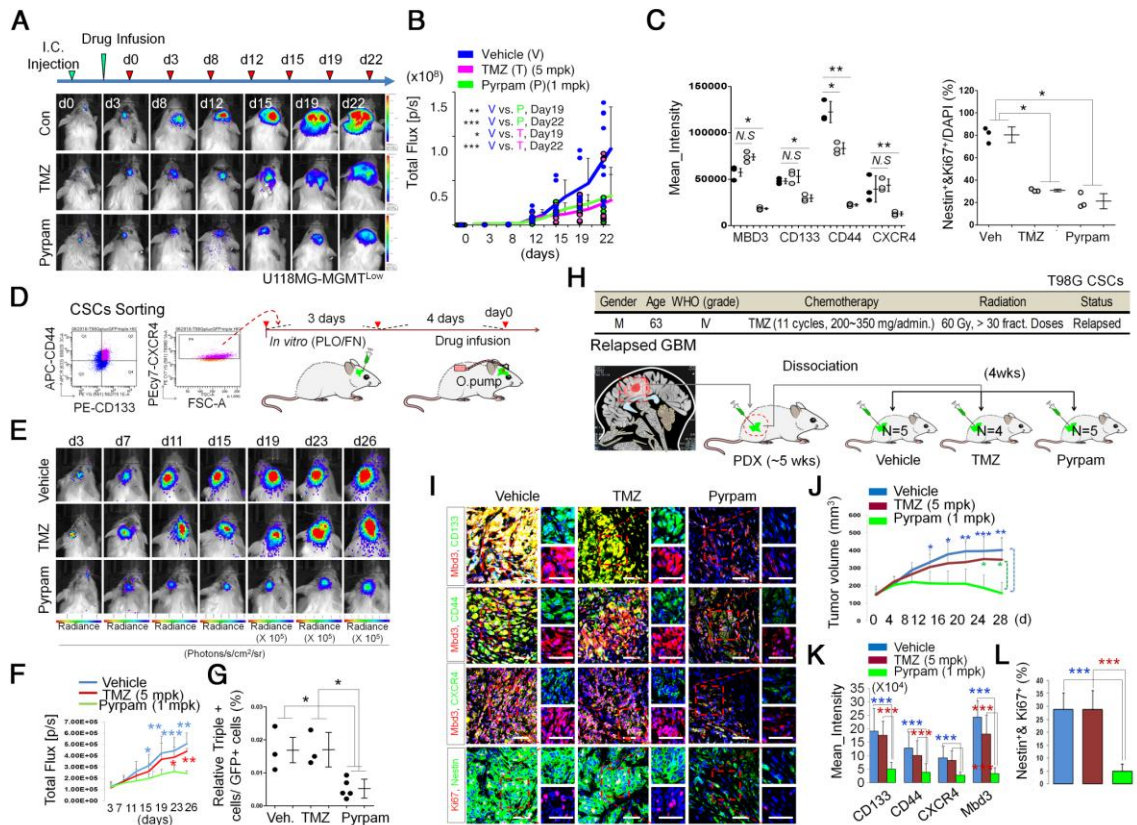

**Fig. S9. Effect of Pyrpaam in GBM Progression and Recurrence Following Temozolomide (TMZ) and Radiation Treatment.** (A, upper) Schematic showing injection of GBM cells and intrathecal infusion of drugs (vehicle, TMZ (5 mg/kg per day), Pyrpaam (1 mg/kg per day)) for 22 days using implanted osmotic pump. pLuc-U118MG cells were intracranially injected into immuno-compromised (NSG) mice (N

= 4 or 5 per group). **(A, lower)** Representative bioluminescence images of mice at indicated times after intracranial injection. **(B)** Tumor volume was measured every 3 or 4 days. Quantification (total flux, photons per second= $p/s$ ) of the bioluminescent signal from tumor regions in **A**. Data are mean  $\pm$  SD ( $n= 4$  or  $5$ ). *P* value by Two-way ANOVA (Bonferroni posttests) test. **(C)** After 4 weeks, mice were sacrificed and analyzed immunohistochemically with indicated antibodies. Expression of CD133, CD44, CXCR4, MBD3, Ki67, and Nestin was quantified using Image J software. Data are mean  $\pm$  SD. *P* value by One-way ANOVA (Tukey's Multiple Comparison) test. **(D)** Schematic showing injection of sorted GSCs and intrathecal infusion of drugs (vehicle, TMZ (5 mg/kg per day), Pypam (1 mg/kg per day)) for 26 days using implanted osmotic pump. **(E)** Representative bioluminescence images of mice at indicated times after intracranial injection. **(F)** Tumor volume was measured every 3 or 4 days. Quantification (total flux, photons per second= $p/s$ ) of the bioluminescent signal from tumor regions in **E**. Data are mean  $\pm$  SD ( $n= 5$  or  $6$ ). *P* value by Two-way ANOVA (Bonferroni posttests) test. **(G)** FACS analysis of CD44/CD133/CXCR4 triple-positive populations within GBMs in xenografted tumors derived from various GSCs. **(H)** Schematic showing patient information (upper), and subcutaneous (s.c.) injection of dissociated human tumors into immunocompromised mice plus intra-tumoral injection



of vehicle, TMZ (5 mg/kg per day), and Pypam (1 mg/kg per day) (lower, n=4 or 5). **(I)** Tumor volume was measured every 4 days. Data are mean  $\pm$  SD (n=4 or 5). *P* value by Two-way ANOVA (Bonferroni posttests) test. **(J)** After 4 weeks, mice were sacrificed and analyzed immunohistochemically with indicated antibodies. **(K and L)** Expression of CD44, CD133, CXCR4, Mbd3 in **K**, Ki67, and Nestin in **L** in a GBM in each representative xenograft GBM tumor in **J** was quantified using Image J software. Images were captured using a Zeiss confocal microscope. Representative images were selected from at least 3 different fields. Data are mean  $\pm$  SD (N>3). *P* value by One-way ANOVA (Tukey's Multiple Comparison) test.

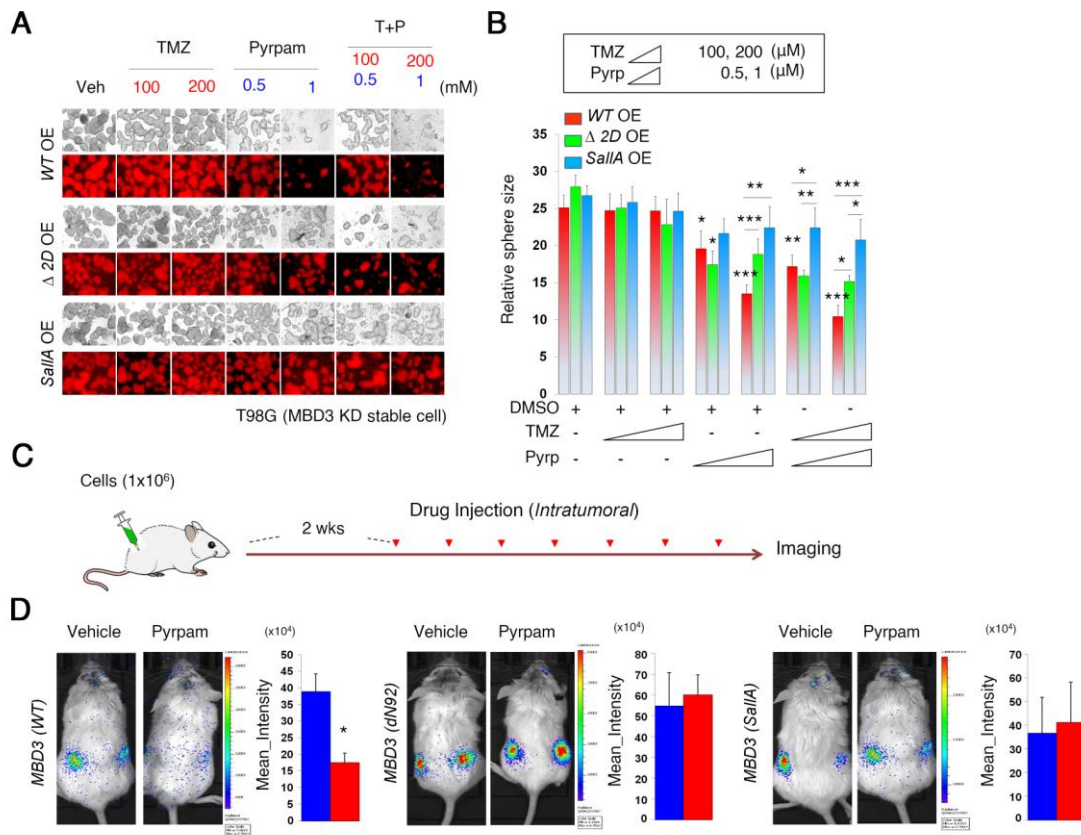

**Fig. S10. Pyrpam inhibits progression of GBM cells expressing wild-Type Mbd3, but not those expressing phospho-defective mutants of Mbd3.** (A and B) Wild-type Mbd3 (WT) or its mutant forms ( $\Delta 2D$ ), and (SallA) T98G cells expressing mCherry were seeded on 12 well plates and treated with indicated concentrations of TMZ, Pyrpam, or both for 8 days. Sphere forming assays were performed. Spheres were photographed and (right) quantified using Image J software. Data are mean  $\pm$  SD (N>3). P value by One-way ANOVA (Tukey's Multiple Comparison) test. (C and D) Schematic showing in vivo xenograft experiment, and subcutaneous (s.c.) injection of Wild-type MBD3 (WT) or its mutant forms ( $\Delta 2D$ ), and (SallA) T98G cells into

immunocompromised mice plus intratumoral injection of vehicle, TMZ (5 mg/kg per day), and Pypam (1 mg/kg per day) (lower, n = 4). **(D)** Quantification (total flux, photons per second=p/s) of the bioluminescent signal from tumor regions. (\**P* < 0.05).

Data are mean ± SD (n=3). *P* value by unpaired 2-tailed Student's *t* test.

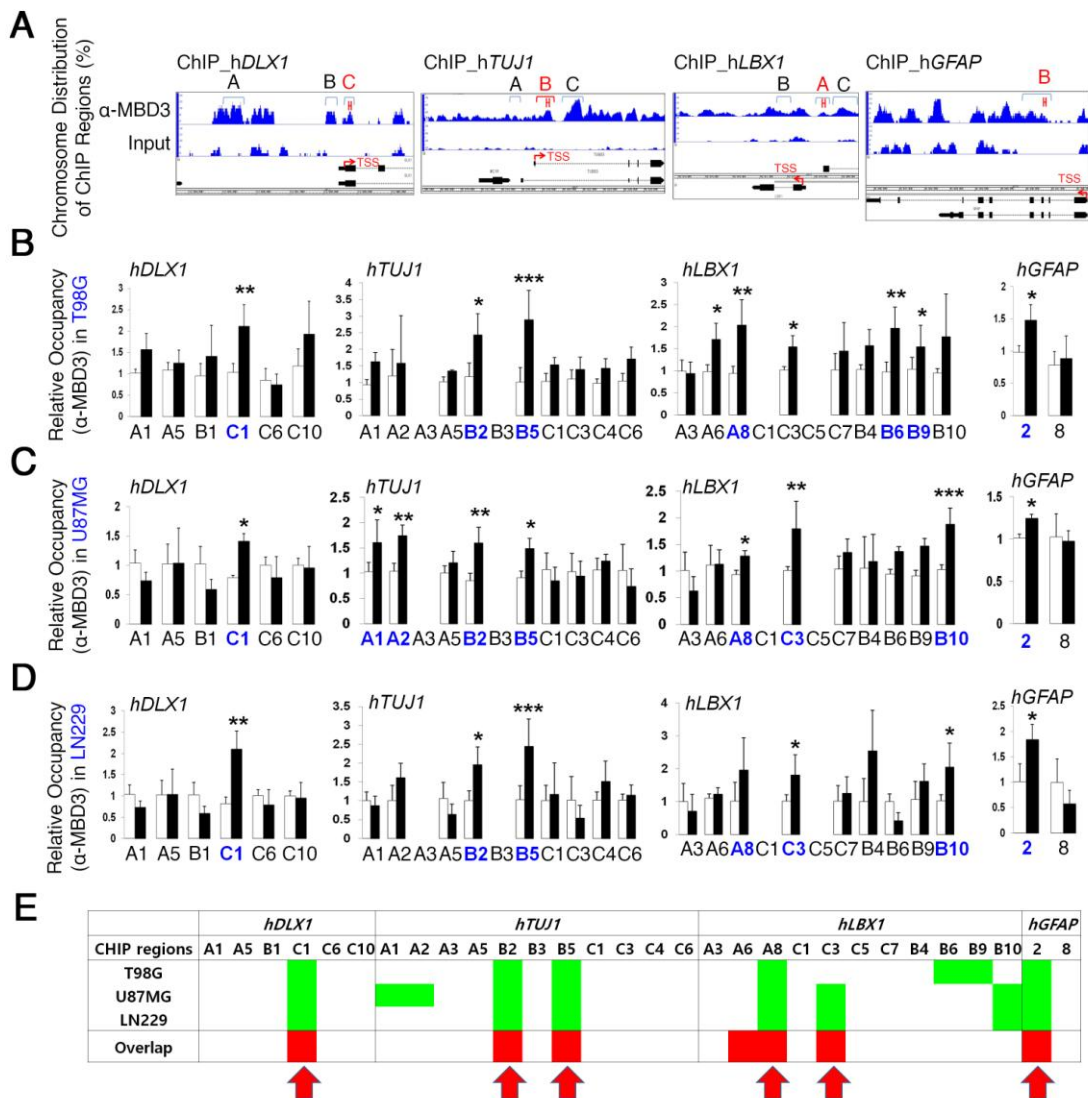

**Fig. S11. MBD3 and nucleosomal remodeling histone deacetylase (NuRD) complex components colocalize on neural differentiation associated gene promoters and gene bodies.** (A) Human MBD3-chromatin immunoprecipitation sequencing (ChIP-seq) analysis in Breast Cancer Cells (GSE44737)<sup>1</sup>. MBD3-binding peaks in Breast Cancer Cells in differentiation genes such as *Dlx1*, *Tuj1*, *Lbx1*, and *Gfap*. (B-D) ChIP-qPCR analysis of MBD3 occupancy at the putative MBD3-binding loci of T98G in fig. S11B, U87MG in Fig. S11C, and LN229 in fig. S11D of GBM cell lines. (E) ChIP-qPCR analysis of MBD3 identify gene loci that overlap in three different GBM cell lines. Red arrows indicate overlapped gene loci obtained from the MBD3 ChIP-qPCR analysis using three different GBM cell lines. All values in fig S11, B to D correspond to the mean  $\pm$  SD (N>3). *P* value by Two-way ANOVA (Bonferroni posttests) test.

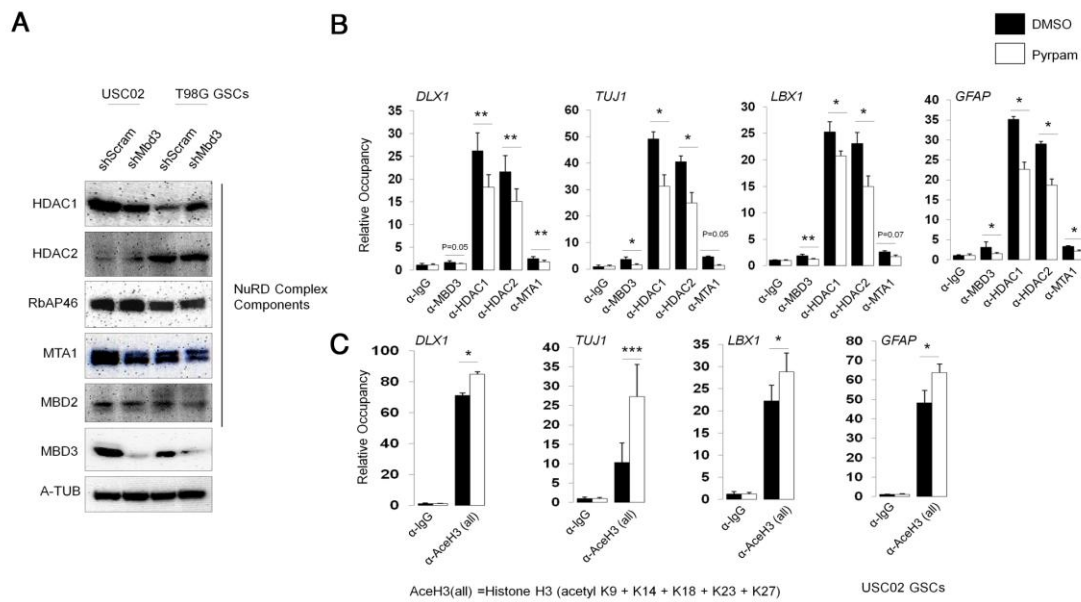

**Fig. S12. MBD3 loss doesn't change protein expression of NuRD complex components and decreases occupancy of MBD3-NuRD complex components on neural differentiation associated gene promoters and gene bodies in GSCs. (A)** USC02 or T98G GSCs were infected by pLKO3G-shMBD3 #1 and #2 lentiviral vectors and shcontrol or shMBD3 knockdown GSC cells were subjected to immunoblotting analysis with indicated antibodies. **(B and C)** ChIP-qPCR analysis of MBD3, HDAC1, HDAC2, MTA1, and acetyl histone H3 occupancy at MBD3-binding locus in USC02 GSCs treated with DMSO (N = 3) and Pyrvinium pamoate (N = 3). Immunoglobulin G (IgG) ChIP served as a negative control. Values are normalized to input control and represent mean  $\pm$  SD (N=3). *P* value by One-way ANOVA (Tukey's Multiple Comparison) test.

## REFERENCES

1. Shimbo, T., *et al.* MBD3 localizes at promoters, gene bodies and enhancers of active genes. *PLoS genetics* 9, e1004028 (2013).

## Supplemental Tables

**Supplementary Table S1. Clinicopathological features of 39 subjects with RNA sequencing.**

| No. | Patients | Site       | Sex | Age | Race | RIN |
|-----|----------|------------|-----|-----|------|-----|
| 1   | RL15     | CEREBELLUM | F   | 55  | C    | 7.1 |
| 2   | RL16     | CEREBELLUM | F   | 56  | C    | 7.8 |
| 3   | RL17     | CEREBELLUM | F   | 57  | C    | 5.6 |
| 4   | RL18     | CEREBELLUM | M   | 55  | C    | 6.3 |
| 5   | RL19     | CEREBELLUM | M   | 55  | C    | 6   |
| 6   | RL20     | CEREBELLUM | M   | 57  | C    | 6.3 |
| 7   | RL21     | CORTEX     | F   | 60  | C    | 7.7 |
| 8   | RL22     | CORTEX     | M   | 60  | C    | 8.1 |
| 9   | RL23     | CORTEX     | F   | 60  | C    | 7.1 |
| 10  | RL24     | CORTEX     | M   | 56  | C    | 6   |
| 11  | RL25     | CORTEX     | F   | 56  | C    | 7.4 |
| 12  | RL26     | CORTEX     | M   | 56  | C    | 6.1 |
| 13  | RL40     | CORTEX     | M   | 64  | C    | 7.3 |
| 14  | RL41     | CORTEX     | M   | 62  | C    | 4.2 |
| 15  | RL42     | CORTEX     | M   | 56  | A    | 7.4 |
| 16  | RL43     | CORTEX     | F   | 82  | C    | 6.9 |
| 17  | RL44     | CORTEX     | F   | 61  | C    | 6.8 |
| 18  | RL45     | CORTEX     | M   | 55  | C    | 5.4 |
| 19  | RL46     | CORTEX     | F   | 63  | C    | 6.8 |
| 20  | RL1      | GBM        | M   | 63  | C    | 7.1 |
| 21  | RL2      | GBM        | F   | 43  | C    | 7   |
| 22  | RL3      | GBM        | F   | 57  | C    | 3.8 |
| 23  | RL4      | GBM        | M   | 58  | C    | 1.1 |
| 24  | RL5      | GBM        | M   | 56  | C    | 2.8 |
| 25  | RL6      | GBM        | M   | 57  | C    | 2.2 |
| 26  | RL7      | GBM        | F   | 43  | C    | 7.9 |
| 27  | RL27     | GBM        | M   | 81  | C    | 6.9 |
| 28  | RL28     | GBM        | F   | 59  | C    | 8   |

|                                                                                                                                                                                                                               |      |     |   |    |   |     |
|-------------------------------------------------------------------------------------------------------------------------------------------------------------------------------------------------------------------------------|------|-----|---|----|---|-----|
| <b>29</b>                                                                                                                                                                                                                     | RL29 | GBM | F | 57 | C | 8.3 |
| <b>30</b>                                                                                                                                                                                                                     | RL30 | GBM | M | 39 | C | 7.5 |
| <b>31</b>                                                                                                                                                                                                                     | RL31 | GBM | F | 50 | C | 7.8 |
| <b>32</b>                                                                                                                                                                                                                     | RL32 | GBM | M | 49 | C | 7.3 |
| <b>33</b>                                                                                                                                                                                                                     | RL33 | GBM | F | 76 | A | 7   |
| <b>34</b>                                                                                                                                                                                                                     | RL34 | GBM | M | 64 | C | 2.3 |
| <b>35</b>                                                                                                                                                                                                                     | RL35 | GBM | M | 48 | C | 6.5 |
| <b>36</b>                                                                                                                                                                                                                     | RL36 | GBM | M | 54 | A | 6   |
| <b>37</b>                                                                                                                                                                                                                     | RL37 | GBM | M | 61 | C | 7.4 |
| <b>38</b>                                                                                                                                                                                                                     | RL38 | GBM | M | 76 | C | 7.5 |
| <b>39</b>                                                                                                                                                                                                                     | RL39 | GBM | M | 66 | C | 8.1 |
| <p><b>GBM</b> = glioblastoma multiforme; <b>Cortex</b> = cortical brain controls; <b>Cerebellum</b>: cerebellar controls., <b>C</b> = Caucasian; <b>A</b> = Asian; <b>H</b> = Hispanic, <b>RIN</b> = RNA integrity number</p> |      |     |   |    |   |     |

**Supplementary Table S2. 69 putative cell surface cancer stem cell or progenitor markers analyzed with RNA sequencing**

| <b>No</b> | <b>Gene</b> | <b>N</b><br><b>o</b> | <b>Gene</b>      | <b>N</b><br><b>o</b> | <b>Gene</b>     | <b>N</b><br><b>o</b> | <b>Gene</b>      |
|-----------|-------------|----------------------|------------------|----------------------|-----------------|----------------------|------------------|
| <b>1</b>  | CD4         | <b>19</b>            | CD84<br>(SLAMF5) | <b>37</b>            | ETFA            | <b>55</b>            | ATXN1L           |
| <b>2</b>  | CD14        | <b>20</b>            | CD86             | <b>38</b>            | FLOT2           | <b>56</b>            | EPCAM            |
| <b>3</b>  | CD19        | <b>21</b>            | CD93             | <b>39</b>            | GATA3           | <b>57</b>            | CXCR1            |
| <b>4</b>  | CD24        | <b>22</b>            | CD96             | <b>40</b>            | ITGA2           | <b>58</b>            | CX3CR1           |
| <b>5</b>  | CD27        | <b>23</b>            | CD97             | <b>41</b>            | ITGA2B          | <b>59</b>            | CX3CL1           |
| <b>6</b>  | CD33        | <b>24</b>            | CD99             | <b>42</b>            | ITGA4           | <b>60</b>            | DLL4             |
| <b>7</b>  | CD34        | <b>25</b>            | CD109            | <b>43</b>            | ITGA6           | <b>61</b>            | AFP              |
| <b>8</b>  | CD37        | <b>26</b>            | CD133            | <b>44</b>            | ITGB1           | <b>62</b>            | ANPEP<br>(=CD13) |
| <b>9</b>  | CD38        | <b>27</b>            | CD151            | <b>45</b>            | KIT<br>(=CD117) | <b>63</b>            | ERBB2            |
| <b>10</b> | CD44        | <b>28</b>            | CD163            | <b>46</b>            | MS4A1           | <b>64</b>            | PTEN             |



|                        |      |                                                                                                                                                                                                            |                         |           |             |           |                   |
|------------------------|------|------------------------------------------------------------------------------------------------------------------------------------------------------------------------------------------------------------|-------------------------|-----------|-------------|-----------|-------------------|
|                        |      |                                                                                                                                                                                                            |                         |           | (=CD20)     |           |                   |
| <b>11</b>              | CD52 | <b>29</b>                                                                                                                                                                                                  | CD164                   | <b>47</b> | MUC1        | <b>65</b> | TNFAIP3<br>(=A20) |
| <b>12</b>              | CD53 | <b>30</b>                                                                                                                                                                                                  | CD166                   | <b>48</b> | PECAM1      | <b>66</b> | EPAS1             |
| <b>13</b>              | CD58 | <b>31</b>                                                                                                                                                                                                  | CD171                   | <b>49</b> | THY1(=CD90) | <b>67</b> | CLEC12<br>A       |
| <b>14</b>              | CD63 | <b>32</b>                                                                                                                                                                                                  | CD184                   | <b>50</b> | ABCB5       | <b>68</b> | THY1              |
| <b>15</b>              | CD68 | <b>33</b>                                                                                                                                                                                                  | CD276                   | <b>51</b> | ABCG2       | <b>69</b> | NF2               |
| <b>16</b>              | CD74 | <b>34</b>                                                                                                                                                                                                  | CD302                   | <b>52</b> | MET         |           |                   |
| <b>17</b>              | CD81 | <b>35</b>                                                                                                                                                                                                  | CD320                   | <b>53</b> | LGR5        |           |                   |
| <b>18</b>              | CD82 | <b>36</b>                                                                                                                                                                                                  | ENG<br>(Endoglin/CD105) | <b>54</b> | ATXN1       |           |                   |
| <b>Type of Cancer</b>  |      | <b>(Cancer) Stem Cell Markers (Reference)</b>                                                                                                                                                              |                         |           |             |           |                   |
| Glioma/Medulloblastoma |      | EPAS1 (=HIF2A) (1), TNFAIP3 (=A20) (2), CD171 (=L1CAM) (3), CX3CR1 (4), CX3CL1 (4)                                                                                                                         |                         |           |             |           |                   |
| Glioblastoma           |      | CD109 (5), ITGA6 (6), CD44 (7), CD133 (7), CD97 (8)                                                                                                                                                        |                         |           |             |           |                   |
| Thyroid Cancer         |      | PECAM1 (9), ITGA4 (9), CD34 (9), CD38 (9)                                                                                                                                                                  |                         |           |             |           |                   |
| Head&Neck Cancer       |      | CD44 (10), ABCG2 (11), CD133 (12), CD44 (12), MET (13), CD168 (14)                                                                                                                                         |                         |           |             |           |                   |
| Lung Cancer            |      | KIT (15), THY1 (16), ABCG2 (17), EPCAM (17), CD74 (18), CD164 (19), ETFA (20)                                                                                                                              |                         |           |             |           |                   |
| Breast Cancer          |      | CD14 (21), CD24 (22), CD29 (23), CD133 (24), CD44 (25), CD81 (26), CD184 (27), FLOT2 (28), ITGA6 (29), CXCR1 (30), ErbB2 (31), PTEN (32), ATXN1 (33), CD276 (B7-H3) (34), ITGB1 (35), Muc1 (36), CD81 (26) |                         |           |             |           |                   |
| Gastric Cancer         |      | CXCR4 (CD181), CD44 (37), CD163 (38), CD133 (39), Lgr5 (39)                                                                                                                                                |                         |           |             |           |                   |
| Liver Cancer           |      | KIT (40), CD34 (40), CD24 (40), THY1 (=CD90) (40), AFP (40), EPCAM (40), CD133 (40), CD44 (40), AFP (41), EPCAM (41), ANPEP (=CD13) (40), NF2 (42)                                                         |                         |           |             |           |                   |
| Pancreatic Cancer      |      | CD44 (43), MUC1 (44)                                                                                                                                                                                       |                         |           |             |           |                   |
| Colon Cancer           |      | CD44 (45), CD133 (45), CD58 (46), CD166 (45), Lgr5 (47), EPCAM (48), DLL4 (49)                                                                                                                             |                         |           |             |           |                   |
| Prostate Cancer        |      | CD44 (37), CD81 (26), CD151 (50), ABCG2 (51), CD68                                                                                                                                                         |                         |           |             |           |                   |

|                            |                                                                                                         |
|----------------------------|---------------------------------------------------------------------------------------------------------|
|                            | (52)                                                                                                    |
| Kidney Cancer              | ENG (Endoglin/CD105) (53)                                                                               |
| Osteosarcoma               | CD44 (54), CD133 (54)                                                                                   |
| Ovarian Cancer             | CD24 (55), CD44 (55), CD133 (55), CD117 (=c-KIT) (55),<br>ENG (Endoglin/CD105) (56), GATA3 (57)         |
| Leukemia                   | CD33 (58), CD37 (59), CD52 (60), CD82 (61), CD96 (62),<br>KIT (63), CLEC12A (64), CD93 (65), CD302 (66) |
| Lymphoma                   | CD320 (67) (68)                                                                                         |
| Myeloma                    | CD19 (69), CD27 (69), CD38 (69), MS4A1 (70), ABCB5<br>(69), CD99 (71)                                   |
| Melanoma                   | CD133 (72), MS4A1 (=CD20) (72), ABCB5 (73), ABCG2<br>(74)                                               |
| Hematopoietic Stem<br>Cell | CD53 (75), CD63 (75), ATxN1L (76), CD84 (SLAMF5) (77),<br>CD164 (78), ITGA2B (79), CD86 (78)            |
| Stem-like Immune Cell      | CD4 (80)                                                                                                |

## References

1. Li Z, Bao S, Wu Q, Wang H, Eyler C, Sathornsumetee S, et al. Hypoxia-inducible factors regulate tumorigenic capacity of glioma stem cells. *Cancer cell*. 2009;15(6):501-13.
2. Hjelmeland AB, Wu Q, Wickman S, Eyler C, Heddleston J, Shi Q, et al. Targeting A20 decreases glioma stem cell survival and tumor growth. *PLoS biology*. 2010;8(2):e1000319.
3. Bao S, Wu Q, Li Z, Sathornsumetee S, Wang H, McLendon RE, et al. Targeting cancer stem cells through L1CAM suppresses glioma growth. *Cancer research*. 2008;68(15):6043-8.
4. Erreni M, Solinas G, Brescia P, Osti D, Zunino F, Colombo P, et al. Human glioblastoma tumours and neural cancer stem cells express the chemokine CX3CL1 and its receptor CX3CR1. *Eur J Cancer*. 2010;46(18):3383-92.
5. Minata M, Audia A, Shi J, Lu S, Bernstock J, Pavlyukov MS, et al. Phenotypic Plasticity of Invasive Edge Glioma Stem-like Cells in Response to Ionizing Radiation. *Cell reports*. 2019;26(7):1893-905 e7.
6. Lathia JD, Gallagher J, Heddleston JM, Wang J, Eyler CE, Macswords J, et al. Integrin alpha 6 regulates glioblastoma stem cells. *Cell stem cell*. 2010;6(5):421-32.

7. Brown DV, Filiz G, Daniel PM, Hollande F, Dworkin S, Amiridis S, et al. Expression of CD133 and CD44 in glioblastoma stem cells correlates with cell proliferation, phenotype stability and intra-tumor heterogeneity. *PloS one*. 2017;12(2):e0172791.
8. Safaee M, Fakurnejad S, Bloch O, Clark AJ, Ivan ME, Sun MZ, et al. Proportional upregulation of CD97 isoforms in glioblastoma and glioblastoma-derived brain tumor initiating cells. *PloS one*. 2015;10(2):e0111532.
9. Liotti F, Collina F, Pone E, La Sala L, Franco R, Prevete N, et al. Interleukin-8, but not the Related Chemokine CXCL1, Sustains an Autocrine Circuit Necessary for the Properties and Functions of Thyroid Cancer Stem Cells. *Stem Cells*. 2017;35(1):135-46.
10. Trapasso S, and Allegra E. Role of CD44 as a marker of cancer stem cells in head and neck cancer. *Biologics : targets & therapy*. 2012;6:379-83.
11. Shen B, Dong P, Li D, and Gao S. Expression and function of ABCG2 in head and neck squamous cell carcinoma and cell lines. *Experimental and therapeutic medicine*. 2011;2(6):1151-7.
12. Satpute PS, Hazarey V, Ahmed R, and Yadav L. Cancer stem cells in head and neck squamous cell carcinoma: a review. *Asian Pacific journal of cancer prevention : APJCP*. 2013;14(10):5579-87.
13. Xiao M, Liu L, Zhang S, Yang X, and Wang Y. Cancer stem cell biomarkers for head and neck squamous cell carcinoma: A bioinformatic analysis. *Oncology reports*. 2018;40(6):3843-51.
14. Johrens K, Anagnostopoulos I, Dommerich S, Raguse JD, Szczepek AJ, Klauschen F, et al. Expression patterns of CD168 correlate with the stage and grade of squamous cell carcinoma of head and neck. *Molecular and clinical oncology*. 2017;6(4):597-602.
15. Levina V, Marrangoni A, Wang T, Parikh S, Su Y, Herberman R, et al. Elimination of human lung cancer stem cells through targeting of the stem cell factor-c-kit autocrine signaling loop. *Cancer research*. 2010;70(1):338-46.
16. Herreros-Pomares A, de-Maya-Girones JD, Calabuig-Farinas S, Lucas R, Martinez A, Pardo-Sanchez JM, et al. Lung tumorspheres reveal cancer stem cell-like properties and a score with prognostic impact in resected non-small-cell lung cancer. *Cell death & disease*. 2019;10(9):660.
17. Zakaria N, Satar NA, Abu Halim NH, Ngalim SH, Yusoff NM, Lin J, et al. Targeting Lung Cancer Stem Cells: Research and Clinical Impacts. *Frontiers in oncology*. 2017;7:80.

18. Murayama T, Nakaoku T, Enari M, Nishimura T, Tominaga K, Nakata A, et al. Oncogenic Fusion Gene CD74-NRG1 Confers Cancer Stem Cell-like Properties in Lung Cancer through a IGF2 Autocrine/Paracrine Circuit. *Cancer research*. 2016;76(4):974-83.
19. Chen WL, Huang AF, Huang SM, Ho CL, Chang YL, and Chan JY. CD164 promotes lung tumor-initiating cells with stem cell activity and determines tumor growth and drug resistance via Akt/mTOR signaling. *Oncotarget*. 2017;8(33):54115-35.
20. Bonuccelli G, Peiris-Pages M, Ozsvari B, Martinez-Outschoorn UE, Sotgia F, and Lisanti MP. Targeting cancer stem cell propagation with palbociclib, a CDK4/6 inhibitor: Telomerase drives tumor cell heterogeneity. *Oncotarget*. 2017;8(6):9868-84.
21. Hwang-Verslues WW, Kuo WH, Chang PH, Pan CC, Wang HH, Tsai ST, et al. Multiple lineages of human breast cancer stem/progenitor cells identified by profiling with stem cell markers. *PloS one*. 2009;4(12):e8377.
22. Rostoker R, Abelson S, Genkin I, Ben-Shmuel S, Sachidanandam R, Scheinman EJ, et al. CD24(+) cells fuel rapid tumor growth and display high metastatic capacity. *Breast cancer research : BCR*. 2015;17:78.
23. Vassilopoulos A, Chisholm C, Lahusen T, Zheng H, and Deng CX. A critical role of CD29 and CD49f in mediating metastasis for cancer-initiating cells isolated from a Brca1-associated mouse model of breast cancer. *Oncogene*. 2014;33(47):5477-82.
24. Cordone I, Masi S, Summa V, Carosi M, Vidiri A, Fabi A, et al. Overexpression of syndecan-1, MUC-1, and putative stem cell markers in breast cancer leptomeningeal metastasis: a cerebrospinal fluid flow cytometry study. *Breast cancer research : BCR*. 2017;19(1):46.
25. Al-Hajj M, Wicha MS, Benito-Hernandez A, Morrison SJ, and Clarke MF. Prospective identification of tumorigenic breast cancer cells. *Proceedings of the National Academy of Sciences of the United States of America*. 2003;100(7):3983-8.
26. Kumar D, Gupta D, Shankar S, and Srivastava RK. Biomolecular characterization of exosomes released from cancer stem cells: Possible implications for biomarker and treatment of cancer. *Oncotarget*. 2015;6(5):3280-91.
27. Trautmann F, Cojoc M, Kurth I, Melin N, Bouchez LC, Dubrovskaya A, et al. CXCR4 as biomarker for radioresistant cancer stem cells. *International journal*

- of radiation biology*. 2014;90(8):687-99.
28. Velapasamy S, Dawson CW, Young LS, Paterson IC, and Yap LF. The Dynamic Roles of TGF-beta Signalling in EBV-Associated Cancers. *Cancers*. 2018;10(8).
  29. Cariati M, Naderi A, Brown JP, Smalley MJ, Pinder SE, Caldas C, et al. Alpha-6 integrin is necessary for the tumorigenicity of a stem cell-like subpopulation within the MCF7 breast cancer cell line. *International journal of cancer*. 2008;122(2):298-304.
  30. Brandolini L, Cristiano L, Fidoamore A, De Pizzol M, Di Giacomo E, Florio TM, et al. Targeting CXCR1 on breast cancer stem cells: signaling pathways and clinical application modelling. *Oncotarget*. 2015;6(41):43375-94.
  31. Wang X, Sun Y, Wong J, and Conklin DS. PPARgamma maintains ERBB2-positive breast cancer stem cells. *Oncogene*. 2013;32(49):5512-21.
  32. Korkaya H, Paulson A, Charafe-Jauffret E, Ginestier C, Brown M, Dutcher J, et al. Regulation of mammary stem/progenitor cells by PTEN/Akt/beta-catenin signaling. *PLoS biology*. 2009;7(6):e1000121.
  33. Ke J, Zhao Z, Hong SH, Bai S, He Z, Malik F, et al. Role of microRNA221 in regulating normal mammary epithelial hierarchy and breast cancer stem-like cells. *Oncotarget*. 2015;6(6):3709-21.
  34. Liu Z, Zhang W, Phillips JB, Arora R, McClellan S, Li J, et al. Immunoregulatory protein B7-H3 regulates cancer stem cell enrichment and drug resistance through MVP-mediated MEK activation. *Oncogene*. 2019;38(1):88-102.
  35. Barnawi R, Al-Khalidi S, Colak D, Tulbah A, Al-Tweigeri T, Fallatah M, et al. beta1 Integrin is essential for fascin-mediated breast cancer stem cell function and disease progression. *International journal of cancer*. 2019;145(3):830-41.
  36. Alam M, Rajabi H, Ahmad R, Jin C, and Kufe D. Targeting the MUC1-C oncoprotein inhibits self-renewal capacity of breast cancer cells. *Oncotarget*. 2014;5(9):2622-34.
  37. Collins AT, Berry PA, Hyde C, Stower MJ, and Maitland NJ. Prospective identification of tumorigenic prostate cancer stem cells. *Cancer research*. 2005;65(23):10946-51.
  38. Cheng Z, Zhang D, Gong B, Wang P, and Liu F. CD163 as a novel target gene of STAT3 is a potential therapeutic target for gastric cancer. *Oncotarget*. 2017;8(50):87244-62.
  39. Singh SR. Gastric cancer stem cells: a novel therapeutic target. *Cancer letters*. 2013;338(1):110-9.

40. Xiao Y, Lin M, Jiang X, Ye J, Guo T, Shi Y, et al. The Recent Advances on Liver Cancer Stem Cells: Biomarkers, Separation, and Therapy. *Anal Cell Pathol (Amst)*. 2017;2017:5108653.
41. Sun JH, Luo Q, Liu LL, and Song GB. Liver cancer stem cell markers: Progression and therapeutic implications. *World journal of gastroenterology*. 2016;22(13):3547-57.
42. Benhamouche S, Curto M, Saotome I, Gladden AB, Liu CH, Giovannini M, et al. Nf2/Merlin controls progenitor homeostasis and tumorigenesis in the liver. *Genes & development*. 2010;24(16):1718-30.
43. Li C, Heidt DG, Dalerba P, Burant CF, Zhang L, Adsay V, et al. Identification of pancreatic cancer stem cells. *Cancer research*. 2007;67(3):1030-7.
44. Curry JM, Thompson KJ, Rao SG, Besmer DM, Murphy AM, Grdzlishvili VZ, et al. The use of a novel MUC1 antibody to identify cancer stem cells and circulating MUC1 in mice and patients with pancreatic cancer. *Journal of surgical oncology*. 2013;107(7):713-22.
45. Moon BS, Jeong WJ, Park J, Kim TI, Min do S, and Choi KY. Role of oncogenic K-Ras in cancer stem cell activation by aberrant Wnt/beta-catenin signaling. *Journal of the National Cancer Institute*. 2014;106(2):djt373.
46. Xu S, Wen Z, Jiang Q, Zhu L, Feng S, Zhao Y, et al. CD58, a novel surface marker, promotes self-renewal of tumor-initiating cells in colorectal cancer. *Oncogene*. 2015;34(12):1520-31.
47. Morgan RG, Mortenson E, and Williams AC. Targeting LGR5 in Colorectal Cancer: therapeutic gold or too plastic? *British journal of cancer*. 2018;118(11):1410-8.
48. Gires O, Klein CA, and Baeuerle PA. On the abundance of EpCAM on cancer stem cells. *Nature reviews Cancer*. 2009;9(2):143; author reply
49. Badenes M, Trindade A, Pissarra H, Lopes-da-Costa L, and Duarte A. Delta-like 4/Notch signaling promotes Apc (Min/+) tumor initiation through angiogenic and non-angiogenic related mechanisms. *BMC cancer*. 2017;17(1):50.
50. Williamson SC, Hepburn AC, Wilson L, Coffey K, Ryan-Munden CA, Pal D, et al. Human alpha(2)beta(1)(HI) CD133(+VE) epithelial prostate stem cells express low levels of active androgen receptor. *PloS one*. 2012;7(11):e48944.
51. Westover D, and Li F. New trends for overcoming ABCG2/BCRP-mediated resistance to cancer therapies. *Journal of experimental & clinical cancer research : CR*. 2015;34:159.
52. Huang H, Wang C, Liu F, Li HZ, Peng G, Gao X, et al. Reciprocal Network

- between Cancer Stem-Like Cells and Macrophages Facilitates the Progression and Androgen Deprivation Therapy Resistance of Prostate Cancer. *Clinical cancer research : an official journal of the American Association for Cancer Research*. 2018;24(18):4612-26.
53. Hu J, Guan W, Yan L, Ye Z, Wu L, and Xu H. Cancer Stem Cell Marker Endoglin (CD105) Induces Epithelial Mesenchymal Transition (EMT) but Not Metastasis in Clear Cell Renal Cell Carcinoma. *Stem cells international*. 2019;2019:9060152.
  54. Zhao D, Wang S, Chu X, and Han D. LncRNA HIF2PUT inhibited osteosarcoma stem cells proliferation, migration and invasion by regulating HIF2 expression. *Artificial cells, nanomedicine, and biotechnology*. 2019;47(1):1342-8.
  55. Klemba A, Purzycka-Olewiecka JK, Wcislo G, Czarnecka AM, Lewicki S, Lesyng B, et al. Surface markers of cancer stem-like cells of ovarian cancer and their clinical relevance. *Contemp Oncol (Pozn)*. 2018;22(1A):48-55.
  56. Zhang J, Yuan B, Zhang H, and Li H. Human epithelial ovarian cancer cells expressing CD105, CD44 and CD106 surface markers exhibit increased invasive capacity and drug resistance. *Oncology letters*. 2019;17(6):5351-60.
  57. Chen HJ, Huang RL, Liew PL, Su PH, Chen LY, Weng YC, et al. GATA3 as a master regulator and therapeutic target in ovarian high-grade serous carcinoma stem cells. *International journal of cancer*. 2018;143(12):3106-19.
  58. Walter RB, Appelbaum FR, Estey EH, and Bernstein ID. Acute myeloid leukemia stem cells and CD33-targeted immunotherapy. *Blood*. 2012;119(26):6198-208.
  59. De Kouchkovsky I, and Abdul-Hay M. 'Acute myeloid leukemia: a comprehensive review and 2016 update'. *Blood cancer journal*. 2016;6(7):e441.
  60. Blatt K, Herrmann H, Hoermann G, Willmann M, Cerny-Reiterer S, Sadovnik I, et al. Identification of campath-1 (CD52) as novel drug target in neoplastic stem cells in 5q-patients with MDS and AML. *Clinical cancer research : an official journal of the American Association for Cancer Research*. 2014;20(13):3589-602.
  61. Nishioka C, Ikezoe T, Furihata M, Yang J, Serada S, Naka T, et al. CD34(+)/CD38(-) acute myelogenous leukemia cells aberrantly express CD82 which regulates adhesion and survival of leukemia stem cells. *International journal of cancer*. 2013;132(9):2006-19.
  62. Hosen N, Park CY, Tatsumi N, Oji Y, Sugiyama H, Gramatzki M, et al. CD96 is

- a leukemic stem cell-specific marker in human acute myeloid leukemia. *Proceedings of the National Academy of Sciences of the United States of America*. 2007;104(26):11008-13.
63. Somervaille TC, and Cleary ML. Identification and characterization of leukemia stem cells in murine MLL-AF9 acute myeloid leukemia. *Cancer cell*. 2006;10(4):257-68.
  64. Morsink LM, Walter RB, and Ossenkoppele GJ. Prognostic and therapeutic role of CLEC12A in acute myeloid leukemia. *Blood reviews*. 2019;34:26-33.
  65. Iwasaki M, Liedtke M, Gentles AJ, and Cleary ML. CD93 Marks a Non-Quiescent Human Leukemia Stem Cell Population and Is Required for Development of MLL-Rearranged Acute Myeloid Leukemia. *Cell stem cell*. 2015;17(4):412-21.
  66. Lo TH, Abadir E, Gasiorowski RE, Kabani K, Ramesh M, Orellana D, et al. Examination of CD302 as a potential therapeutic target for acute myeloid leukemia. *PloS one*. 2019;14(5):e0216368.
  67. Li L, Yoon SO, Fu DD, Zhang X, and Choi YS. Novel follicular dendritic cell molecule, 8D6, collaborates with CD44 in supporting lymphomagenesis by a Burkitt lymphoma cell line, L3055. *Blood*. 2004;104(3):815-21.
  68. Margolin DA, Myers T, Zhang X, Bertoni DM, Reuter BA, Obokhare I, et al. The critical roles of tumor-initiating cells and the lymph node stromal microenvironment in human colorectal cancer extranodal metastasis using a unique humanized orthotopic mouse model. *FASEB journal : official publication of the Federation of American Societies for Experimental Biology*. 2015;29(8):3571-81.
  69. Hajek R, Okubote SA, and Svachova H. Myeloma stem cell concepts, heterogeneity and plasticity of multiple myeloma. *British journal of haematology*. 2013;163(5):551-64.
  70. Johnsen HE, Bogsted M, Schmitz A, Bodker JS, El-Galaly TC, Johansen P, et al. The myeloma stem cell concept, revisited: from phenomenology to operational terms. *Haematologica*. 2016;101(12):1451-9.
  71. Chung SS, Eng WS, Hu W, Khalaj M, Garrett-Bakelman FE, Tavakkoli M, et al. CD99 is a therapeutic target on disease stem cells in myeloid malignancies. *Science translational medicine*. 2017;9(374).
  72. Fang D, Nguyen TK, Leishear K, Finko R, Kulp AN, Hotz S, et al. A tumorigenic subpopulation with stem cell properties in melanomas. *Cancer research*. 2005;65(20):9328-37.



73. Schatton T, Murphy GF, Frank NY, Yamaura K, Waaga-Gasser AM, Gasser M, et al. Identification of cells initiating human melanomas. *Nature*. 2008;451(7176):345-9.
74. Marzagalli M, Moretti RM, Messi E, Marelli MM, Fontana F, Anastasia A, et al. Targeting melanoma stem cells with the Vitamin E derivative delta-tocotrienol. *Scientific reports*. 2018;8(1):587.
75. Beckmann J, Scheitza S, Wernet P, Fischer JC, and Giebel B. Asymmetric cell division within the human hematopoietic stem and progenitor cell compartment: identification of asymmetrically segregating proteins. *Blood*. 2007;109(12):5494-501.
76. Kahle JJ, Souroullas GP, Yu P, Zohren F, Lee Y, Shaw CA, et al. Ataxin1L is a regulator of HSC function highlighting the utility of cross-tissue comparisons for gene discovery. *PLoS genetics*. 2013;9(3):e1003359.
77. Sintes J, Romero X, de Salort J, Terhorst C, and Engel P. Mouse CD84 is a pan-leukocyte cell-surface molecule that modulates LPS-induced cytokine secretion by macrophages. *Journal of leukocyte biology*. 2010;88(4):687-97.
78. Shimazu T, Iida R, Zhang Q, Welner RS, Medina KL, Alberola-Lla J, et al. CD86 is expressed on murine hematopoietic stem cells and denotes lymphopoietic potential. *Blood*. 2012;119(21):4889-97.
79. Dumon S, Walton DS, Volpe G, Wilson N, Dasse E, Del Pozzo W, et al. Itga2b regulation at the onset of definitive hematopoiesis and commitment to differentiation. *PloS one*. 2012;7(8):e43300.
80. Hong H, Gu Y, Sheng SY, Lu CG, Zou JY, and Wu CY. The Distribution of Human Stem Cell-like Memory T Cell in Lung Cancer. *J Immunother*. 2016;39(6):233-40.

**Supplementary Table S3. 153 human patient information used for TCGA Analyses**

| Sample           | Description             | Sample           | Description                               |
|------------------|-------------------------|------------------|-------------------------------------------|
| TCGA-12-3650-01A | 46 years, male, white   | TCGA-32-2615-01A | 62 years, male, white                     |
| TCGA-19-1390-01A | 63 years, female, white | TCGA-12-5295-01A | 60 years, female, white                   |
| TCGA-19-2629-01A | 60 years, male, white   | TCGA-28-5216-01A | 52 years, male, white                     |
| TCGA-06-0744-01A | 67 years, male, white   | TCGA-12-0619-01A | 60 years, male, white                     |
| TCGA-06-0743-01A | 69 years, male, white   | TCGA-76-4929-01A | 76 years, female, white                   |
| TCGA-06-0747-01A | 53 years, male, white   | TCGA-06-2557-01A | 76 years, male, black or african american |

|                  |                                             |                  |                                             |
|------------------|---------------------------------------------|------------------|---------------------------------------------|
| TCGA-27-2523-01A | 63 years, male, white                       | TCGA-27-1830-01A | 57 years, male, white                       |
| TCGA-14-1034-01A | 60 years, female                            | TCGA-28-1747-01C | 44 years, male, white                       |
| TCGA-26-5134-01A | 74 years, male, white                       | TCGA-14-2554-01A | 52 years, female, white                     |
| TCGA-26-5135-01A | 72 years, female, white                     | TCGA-06-0649-01B | 73 years, female, black or african american |
| TCGA-06-0686-01A | 53 years, male, white                       | TCGA-06-5416-01A | 23 years, female, white                     |
| TCGA-15-0742-01A | 65 years, male, white                       | TCGA-14-0817-01A | 69 years, female, white                     |
| TCGA-32-1970-01A | 59 years, male, white                       | TCGA-06-2558-01A | 75 years, female, white                     |
| TCGA-19-2625-01A | 76 years, female, white                     | TCGA-19-2619-01A | 55 years, female, black or african american |
| TCGA-28-1753-01A | 53 years, male, white                       | TCGA-76-4926-01B | 68 years, male, white                       |
| TCGA-41-5651-01A | 59 years, female, black or african american | TCGA-06-5856-01A | 58 years, male, white                       |
| TCGA-02-2483-01A | 43 years, male, asian                       | TCGA-06-2561-01A | 53 years, female, white                     |
| TCGA-76-4927-01A | 58 years, male, white                       | TCGA-06-5859-01A | 63 years, male, white                       |
| TCGA-06-2570-01A | 21 years, female, white                     | TCGA-28-5220-01A | 67 years, male, white                       |
| TCGA-27-2521-01A | 34 years, male, white                       | TCGA-06-0644-01A | 71 years, male, black or african american   |
| TCGA-41-2572-01A | 67 years, male, white                       | TCGA-06-0882-01A | 30 years, male, white                       |
| TCGA-26-5132-01A | 74 years, male, white                       | TCGA-06-0878-01A | 74 years, male, white                       |
| TCGA-27-2524-01A | 56 years, male, white                       | TCGA-41-4097-01A | 63 years, female, white                     |
| TCGA-06-0125-01A | 63 years, female, white                     | TCGA-15-1444-01A | 21 years, male, white                       |
| TCGA-14-0787-01A | 69 years, male, asian                       | TCGA-28-5204-01A | 72 years, male, white                       |
| TCGA-02-2485-01A | 53 years, male, black or african american   | TCGA-06-0238-01A | 46 years, male, white                       |
| TCGA-28-5209-01A | 66 years, female, white                     | TCGA-06-0184-01A | 63 years, male, white                       |
| TCGA-06-0745-01A | 59 years, male, white                       | TCGA-06-0130-01A | 54 years, male, white                       |
| TCGA-41-2571-01A | 89 years, male, white                       | TCGA-06-0187-01A | 69 years, male, white                       |
| TCGA-06-0211-01B | 47 years, male, white                       | TCGA-27-1834-01A | 56 years, male, white                       |
| TCGA-06-0157-01A | 63 years, female, white                     | TCGA-12-5299-01A | 56 years, female, white                     |
| TCGA-26-5139-01A | 65 years, female, white                     | TCGA-06-2564-01A | 50 years, male, white                       |
| TCGA-06-0174-01A | 54 years, male, white                       | TCGA-28-5218-01A | 63 years, male, white                       |
| TCGA-06-0158-01A | 73 years, male, white                       | TCGA-14-0781-01B | 49 years, male, black or african american   |
| TCGA-19-2624-01A | 51 years, male, white                       | TCGA-06-5413-01A | 67 years, male, white                       |

|                  |                                              |                  |                                                |
|------------------|----------------------------------------------|------------------|------------------------------------------------|
| TCGA-32-2616-01A | 48 years, female, white                      | TCGA-76-4928-01B | 85 years, female, white                        |
| TCGA-32-2634-01A | 82 years, male, white                        | TCGA-02-2486-01A | 64 years, male, white                          |
| TCGA-26-5133-01A | 59 years, male, white                        | TCGA-06-2562-01A | 81 years, male, white                          |
| TCGA-14-0790-01B | 64 years, female, white                      | TCGA-06-5418-01A | 75 years, female, white                        |
| TCGA-12-3652-01A | 60 years, male, white                        | TCGA-06-0138-01A | 43 years, male, white                          |
| TCGA-27-2519-01A | 48 years, male, white                        | TCGA-26-5136-01B | 78 years, female, white                        |
| TCGA-14-1825-01A | 70 years, male, white                        | TCGA-14-0871-01A | 75 years, female, white                        |
| TCGA-08-0386-01A | 74 years, male, white                        | TCGA-28-2499-01A | 59 years, male, white                          |
| TCGA-12-3653-01A | 34 years, female, white                      | TCGA-06-2569-01A | 24 years, female, black<br>or african american |
| TCGA-16-0846-01A | 85 years, male, white                        | TCGA-06-0210-01A | 72 years, female, white                        |
| TCGA-28-2513-01A | 69 years, female, white                      | TCGA-06-5412-01A | 78 years, female, white                        |
| TCGA-06-0156-01A | 57 years, male, white                        | TCGA-06-2559-01A | 83 years, male, white                          |
| TCGA-76-4931-01A | 70 years, female, white                      | TCGA-02-0047-01A | 78 years, male, white                          |
| TCGA-06-0129-01A | 30 years, male, asian                        | TCGA-19-1787-01B | 49 years, male, white                          |
| TCGA-06-5408-01A | 54 years, female, white                      | TCGA-16-1045-01B | 49 years, female, white                        |
| TCGA-32-2638-01A | 67 years, male, white                        | TCGA-06-5411-01A | 51 years, male, white                          |
| TCGA-12-0616-01A | 36 years, female, white                      | TCGA-06-5410-01A | 72 years, female, white                        |
| TCGA-06-0749-01A | 50 years, male, black or<br>african american | TCGA-28-5207-01A | 71 years, male, white                          |
| TCGA-27-1837-01A | 36 years, male, white                        | TCGA-32-1980-01A | 72 years, male, white                          |
| TCGA-06-1804-01A | 81 years, female, white                      | TCGA-26-1442-01A | 43 years, male, white                          |
| TCGA-41-3915-01A | 48 years, male, white                        | TCGA-02-0055-01A | 62 years, female, white                        |
| TCGA-76-4925-01A | 76 years, male, white                        | TCGA-19-4065-01A | 36 years, male, white                          |
| TCGA-06-5414-01A | 61 years, male, white                        | TCGA-06-0141-01A | 62 years, male, white                          |
| TCGA-27-2528-01A | 62 years, male, white                        | TCGA-06-5417-01A | 45 years, female, white                        |
| TCGA-06-0190-01A | 62 years, male, white                        | TCGA-27-2526-01A | 79 years, female, white                        |
| TCGA-06-2563-01A | 72 years, female, white                      | TCGA-06-0132-01A | 49 years, male, white                          |
| TCGA-28-5208-01A | 52 years, male, white                        | TCGA-06-0139-01A | 40 years, male, white                          |
| TCGA-06-0750-01A | 43 years, male, white                        | TCGA-28-5213-01A | 72 years, male, white                          |
| TCGA-12-0821-01A | 62 years, male, white                        | TCGA-32-5222-01A | 66 years, male, white                          |
| TCGA-28-2514-01A | 45 years, male, asian                        | TCGA-06-0178-01A | 39 years, male, white                          |
| TCGA-06-0168-01A | 59 years, female, white                      | TCGA-06-0219-01A | 67 years, male, white                          |
| TCGA-14-0789-01A | 54 years, male, white                        | TCGA-14-1823-01A | 58 years, female, white                        |
| TCGA-06-0646-01A | 61 years, male, white                        | TCGA-14-1829-01A | 57 years, male, black or                       |

|                  |                         |                  |                         |
|------------------|-------------------------|------------------|-------------------------|
|                  |                         |                  | african american        |
| TCGA-06-2565-01A | 59 years, male, asian   | TCGA-28-2509-01A | 77 years, female, white |
| TCGA-19-5960-01A | 56 years, male, white   | TCGA-27-1832-01A | 59 years, female, white |
| TCGA-06-2567-01A | 65 years, male, white   | TCGA-32-2632-01A | 80 years, male, white   |
| TCGA-27-1835-01A | 53 years, female, white | TCGA-12-0618-01A | 49 years, male, white   |
| TCGA-32-1982-01A | 76 years, female, white | TCGA-06-5858-01A | 45 years, female, white |
| TCGA-32-4213-01A | 47 years, female, white | TCGA-06-0645-01A | 56 years, female, white |
| TCGA-28-5215-01A | 62 years, female, white | TCGA-12-1597-01B | 62 years, female, white |
| TCGA-76-4932-01A | 50 years, female, white | TCGA-19-2620-01A | 70 years, male, white   |

**Supplementary Table S4. The list of results obtained from the Mass spectrometry**

**(MS) analysis of Flag-MBD3 in T98G cells.**

| Unique | Total | Reference          | Gene Symbol | MWT(kDa) | AVG    |
|--------|-------|--------------------|-------------|----------|--------|
| 5      | 5     | P63208_SKP1_HUMAN  | SKP1        | 18.65    | 3.668  |
| 3      | 3     | Q13618_CUL3_HUMAN  | CUL3        | 88.87    | 3.0207 |
| 3      | 3     | Q13617_CUL2_HUMAN  | CUL2        | 86.93    | 2.0008 |
| 2      | 2     | Q13616_CUL1_HUMAN  | CUL1        | 89.62    | 3.2357 |
| 1      | 1     | Q9Y297_FBW1A_HUMAN | FBW1A       | 68.87    | 3.5635 |
| 1      | 1     | P63208_SKP1_HUMAN  | SKP1        | 18.65    | 3.5731 |
| 1      | 1     | Q93034_CUL5_HUMAN  | CUL5        | 90.9     | 3.5668 |
| 2      | 2     | O75083_WDR1_HUMAN  | WDR1        | 66.15    | 3.1045 |
| 1      | 2     | Q9BZH6_WDR11_HUMAN | WDR11       | 136.6    | 4.1936 |
| 1      | 1     | Q9GZL7_WDR12_HUMAN | WDR12       | 47.68    | 4.2976 |
| 1      | 2     | Q9GZL7_WDR12_HUMAN | WDR12       | 47.68    | 3.7652 |
| 2      | 2     | Q8NI36_WDR36_HUMAN | WDR36       | 105.26   | 4.6827 |
| 1      | 1     | Q8NI36_WDR36_HUMAN | WDR36       | 105.26   | 2.5706 |
| 2      | 2     | Q9GZS3_WDR61_HUMAN | WDR61       | 33.56    | 3.4202 |
| 3      | 4     | Q9GZS3_WDR61_HUMAN | WDR61       | 33.56    | 3.2014 |
| 1      | 1     | Q6RFH5_WDR74_HUMAN | WDR74       | 42.41    | 3.7702 |
| 5      | 6     | Q9BQA1_MEP50_HUMAN | WDR77       | 36.7     | 3.9328 |
| 5      | 6     | Q9BQA1_MEP50_HUMAN | WDR77       | 36.7     | 4.4334 |
| 1      | 1     | Q6UXN9_WDR82_HUMAN | WDR82       | 35.06    | 3.5807 |

|       |    |                    |         |        |        |
|-------|----|--------------------|---------|--------|--------|
| 2     | 2  | P16455_MGMT_HUMAN  | MGMT    | 21.63  | 3.6122 |
| 3     | 3  | P48735_IDHP_HUMAN  | IDH2    | 50.88  | 3.1843 |
| 1     | 1  | P26358_DNMT1_HUMAN | DNMT1   | 183.05 | 2.833  |
| 2     | 2  | Q9UBB5_MBD2_HUMAN  | MBD2    | 43.23  | 2.0073 |
| 17    | 32 | O95983_MBD3_HUMAN  | MBD3    | 32.82  | 3.436  |
| 10    | 10 | Q12873_CHD3_HUMAN  | CHD3    | 226.45 | 3.1775 |
| 4     | 5  | Q12873_CHD3_HUMAN  | CHD3    | 226.45 | 3.0176 |
| 35    | 43 | Q14839_CHD4_HUMAN  | CHD4    | 217.87 | 2.8225 |
| 8     | 8  | Q13330_MTA1_HUMAN  | MTA1    | 80.74  | 2.5918 |
| 21    | 22 | O94776_MTA2_HUMAN  | MTA2    | 74.98  | 2.9738 |
| 7     | 7  | Q9BTC8_MTA3_HUMAN  | MTA3    | 67.46  | 2.4561 |
| 18    | 42 | Q13547_HDAC1_HUMAN | HDAC1   | 55.07  | 3.1017 |
| 15    | 31 | Q92769_HDAC2_HUMAN | HDAC2   | 55.33  | 3.3458 |
| 2     | 3  | O15379_HDAC3_HUMAN | HDAC3   | 48.82  | 1.9058 |
| <hr/> |    |                    |         |        |        |
| 2     | 2  | P01112_RASH_HUMAN  | HRAS    | 21.28  | 2.7262 |
| 1     | 1  | P01111_RASN_HUMAN  | NRAS    | 21.22  | 2.8052 |
| 1     | 1  | P10301_RRAS_HUMAN  | RRAS    | 23.47  | 3.9139 |
| 2     | 2  | P62070_RRAS2_HUMAN | RRAS2   | 23.38  | 2.9236 |
| 1     | 1  | P28482_MK01_HUMAN  | MAPK1   | 41.36  | 4.5196 |
| 1     | 1  | P35222_CTNB1_HUMAN | CTNNB1  | 85.44  | 3.1438 |
| 1     | 1  | P46940_IQGA1_HUMAN | IQGAP1  | 189.13 | 3.4641 |
| 1     | 1  | Q15796_SMAD2_HUMAN | SMAD2   | 52.27  | 2.3182 |
| 5     | 5  | P23458_JAK1_HUMAN  | JAK1    | 133.19 | 2.172  |
| 5     | 5  | P42224_STAT1_HUMAN | STAT1   | 87.28  | 2.9462 |
| 7     | 7  | P40763_STAT3_HUMAN | STAT3   | 88.01  | 3.144  |
| 2     | 2  | P68400_CSK21_HUMAN | CSNK2A1 | 45.11  | 3.0973 |
| 3     | 3  | P67870_CSK2B_HUMAN | CSNK2B  | 24.93  | 2.1338 |
| 2     | 2  | P48729_KCA1_HUMAN  | CSNK1A1 | 38.91  | 3.0115 |
| <hr/> |    |                    |         |        |        |
| 8     | 8  | Q92499_DDX1_HUMAN  | DDX1    | 82.38  | 3.2822 |
| 4     | 6  | O00571_DDX3X_HUMAN | DDX3X   | 73.2   | 4.0267 |
| 4     | 4  | O15523_DDX3Y_HUMAN | DDX3Y   | 73.11  | 3.0997 |
| 5     | 6  | P17844_DDX5_HUMAN  | DDX5    | 69.1   | 2.7447 |
| 7     | 7  | P26196_DDX6_HUMAN  | DDX6    | 54.38  | 3.9909 |
| 13    | 13 | Q92841_DDX17_HUMAN | DDX17   | 80.22  | 2.9547 |
| 6     | 7  | Q9NR30_DDX21_HUMAN | DDX21   | 87.29  | 3.1675 |

|    |    |                     |           |        |        |
|----|----|---------------------|-----------|--------|--------|
| 1  | 1  | Q9GZR7_DDX24_HUMAN  | DDX24     | 96.27  | 3.5243 |
| 1  | 1  | O00148_DX39A_HUMAN  | DDX39A    | 49.1   | 2.0665 |
| 7  | 7  | Q13838_DX39B_HUMAN  | DDX39B    | 48.96  | 2.74   |
| 3  | 3  | Q7L014_DDX46_HUMAN  | DDX46     | 117.29 | 2.3912 |
| 3  | 3  | Q9H0S4_DDX47_HUMAN  | DDX47     | 50.61  | 3.4887 |
| 1  | 2  | Q9BQ39_DDX50_HUMAN  | DDX50     | 82.51  | 3.7484 |
| 1  | 1  | Q8TDD1_DDX54_HUMAN  | DDX54     | 98.53  | 3.2442 |
| 3  | 3  | O95793_STAU1_HUMAN  | STAU1     | 63.14  | 2.9951 |
| 1  | 1  | Q92900_RENT1_HUMAN  | UPF1      | 124.27 | 2.2569 |
| 2  | 2  | Q13151_ROA0_HUMAN   | HNRNPA0   | 30.82  | 3.6461 |
| 2  | 2  | P09651_ROA1_HUMAN   | HNRNPA1   | 38.72  | 2.8017 |
| 6  | 7  | Q32P51_RA1L2_HUMAN  | HNRNPA1L2 | 34.2   | 2.7358 |
| 7  | 7  | P22626_ROA2_HUMAN   | HNRNPA2B1 | 37.41  | 3.2476 |
| 6  | 6  | P51991_ROA3_HUMAN   | HNRNPA3   | 39.57  | 3.0494 |
| 3  | 10 | Q99729_ROAA_HUMAN   | HNRNPAB   | 36.2   | 2.8189 |
| 1  | 1  | D6RBZ0_D6RBZ0_HUMAN | HNRNPAB   | 35.66  | 3.8845 |
| 1  | 1  | P07910_HNRPC_HUMAN  | HNRNPC    | 33.65  | 2.6657 |
| 1  | 1  | B7ZW38_HNRC3_HUMAN  | HNRNPCL3  | 32.01  | 2.9892 |
| 1  | 1  | Q14103_HNRPD_HUMAN  | HNRNPD    | 38.41  | 2.6145 |
| 1  | 1  | O14979_HNRDL_HUMAN  | HNRNPDL   | 46.41  | 2.4245 |
| 5  | 6  | P52597_HNRPF_HUMAN  | HNRNPF    | 45.64  | 3.3512 |
| 8  | 9  | P31943_HNRH1_HUMAN  | HNRNPH1   | 49.2   | 3.1261 |
| 3  | 3  | P55795_HNRH2_HUMAN  | HNRNPH2   | 49.23  | 2.2487 |
| 15 | 21 | P61978_HNRPK_HUMAN  | HNRNPK    | 50.94  | 3.4598 |
| 12 | 13 | P52272_HNRPM_HUMAN  | HNRNPM    | 77.46  | 3.3127 |
| 4  | 4  | O43390_HNRPR_HUMAN  | HNRNPR    | 70.9   | 3.6795 |
| 9  | 11 | Q00839_HNRPU_HUMAN  | HNRNPU    | 90.53  | 3.0678 |
| 3  | 3  | Q9BUJ2_HNRL1_HUMAN  | HNRNPUL1  | 95.68  | 3.1592 |
| 1  | 1  | O75643_U520_HUMAN   | SNRNP200  | 244.35 | 1.8725 |
| 2  | 2  | P08621_RU17_HUMAN   | SNRNP70   | 51.53  | 2.0077 |
| 1  | 1  | P09661_RU2A_HUMAN   | SNRPA1    | 28.4   | 4.6554 |
| 2  | 2  | P14678_RSMB_HUMAN   | SNRPB     | 24.59  | 2.1128 |
| 2  | 3  | Q01081_U2AF1_HUMAN  | U2AF1     | 27.85  | 2.4669 |
| 6  | 6  | P26368_U2AF2_HUMAN  | U2AF2     | 53.47  | 3.1415 |
| 3  | 3  | P62987_RL40_HUMAN   | UBA52     | 14.72  | 3.0926 |
| 3  | 3  | P17480_UBF1_HUMAN   | UBTF      | 89.35  | 2.717  |

|   |   |                    |        |       |        |
|---|---|--------------------|--------|-------|--------|
| 3 | 5 | P62987_RL40_HUMAN  | UBA52  | 14.72 | 2.911  |
| 1 | 1 | P62837_UB2D2_HUMAN | UBE2D2 | 16.72 | 3.1967 |
| 2 | 2 | P62256_UBE2H_HUMAN | UBE2H  | 20.64 | 2.4016 |
| 3 | 3 | P63279_UBC9_HUMAN  | UBE2I  | 18    | 2.6916 |
| 3 | 3 | P61086_UBE2K_HUMAN | UBE2K  | 22.39 | 3.2048 |
| 6 | 9 | P68036_UB2L3_HUMAN | UBE2L3 | 17.85 | 3.3187 |
| 1 | 1 | O14933_UB2L6_HUMAN | UBE2L6 | 17.76 | 4.2125 |
| 2 | 2 | P61081_UBC12_HUMAN | UBE2M  | 20.89 | 2.4756 |
| 3 | 3 | P61088_UBE2N_HUMAN | UBE2N  | 17.13 | 3.1043 |
| 2 | 2 | Q13404_UB2V1_HUMAN | UBE2V1 | 16.48 | 2.5215 |
| 1 | 1 | Q15819_UB2V2_HUMAN | UBE2V2 | 16.35 | 2.3624 |

**Supplementary Table S5. Summary of pathological categories of patient samples used for primary cell culture and PDX model**

| Gender | Age | WHO (grade)       | Chemotherapy                       | Radiation                | Status             |
|--------|-----|-------------------|------------------------------------|--------------------------|--------------------|
| M      | 63  | GBM (IV)          | TMZ (11 cycles, 200~350 mg/admin.) | 60 Gy, > 30 fract. Doses | Relapsed           |
| M      | 55  | GBM (IV)          | N.A                                | N.A                      | Primary            |
| F      | 64  | GBM (IV)          | N.A                                | N.A                      | Primary            |
| M      | 60  | Glioma (III, IV)  | N.A                                | N.A                      | Primary            |
| F      | 57  | GBM (IV)          | N.A                                | N.A                      | Primary            |
| F      | 69  | GBM (IV)          | N.A                                | N.A                      | Primary            |
| M      | 42  | Glioma (II)       | N.A                                | N.A                      | Primary            |
| M      | 50  | Glioma (III, IV)  | N.A                                | N.A                      | Primary            |
| M      | 53  | Oligodendrocytoma | N.A                                | N.A                      | Metastasis to Dura |
| F      | 47  | Oligodendrocytoma | N.A                                | N.A                      | Primary            |

**Supplementary Table S6. Primer Sequences used for ChIP qPCR Analyses**

| Gene              | Primers               | Temp. | GC (%) | Product size |
|-------------------|-----------------------|-------|--------|--------------|
| hTuj1-ChIP(A1)-F  | CTCGGTTTTCTCTCCGTGCT  | 60.04 | 55     | 214          |
| hTUj1-ChIP(A1)-R  | GTCCCATTCACGGCTCATCA  | 60.11 | 55     |              |
| hTuj1-ChIP(A2)-F  | GTCCACTCTGAGATGCCTGG  | 59.82 | 60     | 135          |
| hTUj1-ChIP(A2)-R  | CTGGCTGAACACAGACCCTC  | 60.32 | 60     |              |
| hTuj1-ChIP(A3)-F  | CTGCCATTCTGGGAGTAGGC  | 60.18 | 60     | 241          |
| hTUj1-ChIP(A3)-R  | GTGGTCTCTTCAGCGAGACG  | 60.46 | 60     |              |
| hTuj1-ChIP(A5)-F  | CTCAGAACTGGGAGCTGCTT  | 59.68 | 55     | 73           |
| hTUj1-ChIP(A5)-R  | GGCTTAAGGCTGACTCACCG  | 60.74 | 60     |              |
| hTuj1-ChIP(B2)-F  | CCTGTCCCTTTGTTGGAGGG  | 60.25 | 60     | 220          |
| hTUj1-ChIP(B2)-R  | CGAGGTGGGCTAACAATGGA  | 59.75 | 55     |              |
| hTuj1-ChIP(B3)-F  | GCCCCTCCCTCCATTGTTAG  | 59.82 | 60     | 286          |
| hTUj1-ChIP(B3)-R  | GATCCCCTGTTCCCAACAC   | 60.32 | 60     |              |
| hTuj1-ChIP(B5)-F  | AAAGGATCTGCCCTCCGAAC  | 59.75 | 55     | 233          |
| hTUj1-ChIP(B5)-R  | GTGGCTGGCCCTGTTGTAAT  | 60.61 | 55     |              |
| hTuj1-ChIP(C3)-F  | TGCCATCTAGCCACCTCTC   | 61.05 | 60     | 186          |
| hTUj1-ChIP(C3)-R  | TCCAGGCCTTAGCACAAAGC  | 60.61 | 55     |              |
| hTuj1-ChIP(C6)-F  | TTTGTGCTAAGGCCTGGATGT | 59.92 | 47.62  | 70           |
| hTUj1-ChIP(C6)-R  | TCGCAGGACCTGTTTTCTCA  | 59.24 | 50     |              |
| hTuj1-ChIP(C4)-F  | TGGGTCTTGAATCCACTCTGC | 60    | 52.38  | 130          |
| hTUj1-ChIP(C4)-R  | GTTCCAGGGAACCCACAACC  | 60.83 | 60     |              |
| hTuj1-ChIP(C1)-F  | TTTACAGGGGCTGGTGGTTG  | 60.18 | 55     | 88           |
| hTUj1-ChIP(C1)-R  | CACTTGAGTCGGGACCTTG   | 60.32 | 60     |              |
| hLbx1-ChIP(B10)-F | ACCAGGGCAAGTCTTGCTA   | 61.13 | 55     | 99           |
| hLbx1-ChIP(B10)-R | ACTCTTAGGTAGGGGCAGA   | 58.98 | 55     |              |
| hLbx1-ChIP(B9)-F  | GTCTCTGCCCCCTACCTAAGA | 60.06 | 57.14  | 87           |
| hLbx1-ChIP(B9)-R  | CCGCAATTAGGGTGTCTCTGT | 60.07 | 52.38  |              |
| hLbx1-ChIP(B4)-F  | AGCCAGACAGAGACACCCTA  | 59.59 | 55     | 115          |
| hLbx1-ChIP(B4)-R  | CGTGGGGAATCGAGAGTCTT  | 59.18 | 55     |              |
| hLbx1-ChIP(B6)-F  | GTCCCCGGCAAAAGACTCTC  | 60.67 | 60     | 110          |
| hLbx1-ChIP(B6)-R  | GCTCTTCCGCAGTCTGCTT   | 60.95 | 55     |              |
| hLbx1-ChIP(C1)-F  | CCTGGGGAGAGGGAATCTGA  | 60.03 | 60     | 248          |
| hLbx1-ChIP(C1)-R  | AAGTGAGCAAGATTGCCGGA  | 59.96 | 50     |              |
| hLbx1-ChIP(C3)-F  | CTCCGGCAATCTTGCTCACT  | 60.39 | 55     | 95           |



|                   |                        |       |       |     |
|-------------------|------------------------|-------|-------|-----|
| hLbx1-ChIP(C3)-R  | CCTGGCTACTCTTCAGACGC   | 60.18 | 60    |     |
| hLbx1-ChIP(C5)-F  | ATGGGGCTCTGAAGAGTAGC   | 59.54 | 55    | 227 |
| hLbx1-ChIP(C5)-R  | TGCGAGTTCCTGAGAGCAAA   | 59.61 | 50    |     |
| hLbx1-ChIP(C7)-F  | TTGCTCTCAGGAACTCGCAG   | 60.04 | 55    | 75  |
| hLbx1-ChIP(C7)-R  | ACAGATCCCGGGCCCTAAG    | 60.77 | 63.16 |     |
| hLbx1-ChIP(A8)-F  | GGCTGTAAAGTTGGGAAGCTCA | 60.27 | 52.38 | 87  |
| hLbx1-ChIP(A8)-R  | GGACTGACAGGCGCATTAGG   | 60.81 | 60    |     |
| hLbx1-ChIP(A6)-F  | CTAATGCGCCTGTCAGTCCG   | 61.15 | 60    | 85  |
| hLbx1-ChIP(A6)-R  | CGGGTGCAATAAAGGAGCAG   | 59.27 | 55    |     |
| hLbx1-ChIP(A3)-F  | CTGCTCCTTTATTGCACCCG   | 59.27 | 55    | 178 |
| hLbx1-ChIP(A3)-R  | GGTTCCCACCACTCTTTCGG   | 60.61 | 60    |     |
| hDlx1-ChIP(A5)-F  | GGCCTTGGGAGATGTTTGCT   | 60.61 | 55    | 372 |
| hDlx1-ChIP(A5)-R  | AGGCGTGGACGAGGTATTTT   | 59.39 | 50    |     |
| hDlx1-ChIP(A1)-F  | AATACCTCGTCCACGCCTTC   | 59.82 | 55    | 90  |
| hDlx1-ChIP(A1)-R  | AGCCACTCTTGGCTGGAATC   | 60.03 | 55    |     |
| hDlx1-ChIP(B1)-F  | GTGGATGCGTCTTACCCGAG   | 60.53 | 60    | 75  |
| hDlx1-ChIP(B1)-R  | GATTGGTCCGAGGCGCT      | 59.43 | 64.71 |     |
| hDlx1-ChIP(C6)-F  | CCCAAAAGGGAAGCAGAGGA   | 59.59 | 55    | 94  |
| hDlx1-ChIP(C6)-R  | CGGGGCTGTTGAGACTTTCT   | 59.96 | 55    |     |
| hDlx1-ChIP(C1)-F  | AGAAAGTCTCAACAGCCCCG   | 59.96 | 55    | 112 |
| hDlx1-ChIP(C1)-R  | ACAGTGCATGGAGTAGTGCC   | 60.04 | 55    |     |
| hDlx1-ChIP(C10)-F | TCTCCTTCTCCCATGTCCCA   | 59.58 | 55    | 140 |
| hDlx1-ChIP(C10)-R | CTGCTGACCGAGTTGACGTA   | 59.76 | 55    |     |
| hGFAP-ChIP(2)-F   | CCATTGTGTCCTCTTCTGCCT  | 60    | 52.38 | 359 |
| hGFAP-ChIP(2)-R   | CTCTACTCCTCACCCCTCCTG  | 60.41 | 61.9  |     |
| hGFAP-ChIP(8)-F   | TCCAGCGACTCAATCTTCCTCT | 60.89 | 50    | 138 |
| hGFAP-ChIP(8)-R   | TAAGGCAAGGCTGAGGAATGGG | 62.35 | 54.55 |     |

**Supplementary Table S7. Primer Sequences used for Quantitative PCR Analyses**

| Genes | Primer Sequences | T <sub>m</sub> (°C) | GC Content |
|-------|------------------|---------------------|------------|
|-------|------------------|---------------------|------------|

|                    |                        |      |      |
|--------------------|------------------------|------|------|
| <i>DLX1 (F)</i>    | TGCCAGAAAGTCTCAACAGCC  | 57.7 | 52.4 |
| <i>DLX1 (R)</i>    | CGAGTGTAACAGTGCATGGA   | 55.2 | 47.6 |
| <i>DLX2 (F)</i>    | ACACCTCCTACGCTCCCTATG  | 58.1 | 57.1 |
| <i>DLX2 (R)</i>    | TCACTATCCGAATTCAGGCTCA | 55.9 | 43.5 |
| <i>TUJ1 (F)</i>    | GGCCAAGGGTCACTACACG    | 58.2 | 63.2 |
| <i>TUJ1 (R)</i>    | GCAGTCGCAGTTTTCACACTC  | 56.8 | 52.4 |
| <i>NeuroD1 (F)</i> | GTCTCCTTCGTTTCAGACGCTT | 57   | 52.4 |
| <i>NeuroD1 (R)</i> | AAAGTCCGAGGATTGAGTTGC  | 55.3 | 47.6 |
| <i>GAD67 (F)</i>   | GCTTCCGGCTAAGAACGGT    | 57.6 | 57.9 |
| <i>GAD67 (R)</i>   | TTGCGGACATAGTTGAGGAGT  | 56   | 47.6 |
| <i>GFAP (F)</i>    | AGGTCCATGTGGAGCTTGAC   | 57.1 | 55   |
| <i>GFAP (R)</i>    | GCCATTGCCTCATACTGCGT   | 58.2 | 55   |
| <i>S100b (F)</i>   | TGGCCCTCATCGACGTTTTTC  | 57.8 | 55   |
| <i>S100b (R)</i>   | ATGTTCAAAGAACTCGTGGCA  | 54.9 | 42.9 |
| <i>MBP (F)</i>     | CCGAGAAGGCCAGTACGAATA  | 56.2 | 52.4 |
| <i>MBP (R)</i>     | CTGAGGTTGTCCGTGAAAGTT  | 55.1 | 47.6 |
| <i>MAG (F)</i>     | GGTGTCTGGTACTTCAATAGCC | 55.1 | 50   |
| <i>MAG (R)</i>     | CTCTCGTGGACTACTTGGGTG  | 56.9 | 57.1 |

|                   |                         |      |      |
|-------------------|-------------------------|------|------|
| <i>CD24 (F)</i>   | CTCCTACCCACGCAGATTTATTC | 55.2 | 47.8 |
| <i>CD24 (R)</i>   | AGAGTGAGACCACGAAGAGAC   | 55.8 | 52.4 |
| <i>CD44 (F)</i>   | CTGCCGCTTTGCAGGTGTA     | 58.4 | 57.9 |
| <i>CD44 (R)</i>   | CATTGTGGGCAAGGTGCTATT   | 56   | 47.6 |
| <i>CD133 (F)</i>  | AGTCGGAAACTGGCAGATAGC   | 57   | 52.4 |
| <i>CD133 (R)</i>  | GGTAGTGTTGTACTGGGCCAAT  | 57.1 | 50   |
| <i>CXCR4 (F)</i>  | ACGCCACCAACAGTCAGAG     | 57.5 | 57.9 |
| <i>CXCR4 (R)</i>  | AGTCGGGAATAGTCAGCAGGA   | 57.5 | 52.4 |
| <i>OCT4 (F)</i>   | GGGAGATTGATAACTGGTGTGTT | 54.8 | 43.5 |
| <i>OCT4 (R)</i>   | GTGTATATCCCAGGGTGATCCTC | 56.2 | 52.2 |
| <i>NANOG (F)</i>  | TTTGTGGGCCTGAAGAAAACCT  | 55   | 42.9 |
| <i>NANOG (R)</i>  | AGGGCTGTCCTGAATAAGCAG   | 56.9 | 52.4 |
| <i>SOX2 (F)</i>   | TACAGCATGTCCTACTCGCAG   | 56.4 | 52.4 |
| <i>SOX2 (R)</i>   | GAGGAAGAGGTAACCACAGGG   | 56.8 | 57.1 |
| <i>KLF4 (F)</i>   | CGGACATCAACGACGTGAG     | 55.8 | 57.9 |
| <i>KLF4 (R)</i>   | GACGCCTTCAGCACGAACT     | 58   | 57.9 |
| <i>NESTIN (F)</i> | CTGCTACCCTTGAGACACCTG   | 57.2 | 57.1 |
| <i>NESTIN (R)</i> | GGGCTCTGATCTCTGCATCTAC  | 56.8 | 54.5 |

|                                                         |                        |      |      |
|---------------------------------------------------------|------------------------|------|------|
| <i>PAX6 (F)</i>                                         | TGGGCAGGTATTACGAGACTG  | 56.3 | 52.4 |
| <i>PAX6 (R)</i>                                         | ACTCCCGCTTATACTGGGCTA  | 57.4 | 52.4 |
| <i>BMI1 (F)</i>                                         | CCACCTGATGTGTGTGCTTTG  | 56.7 | 52.4 |
| <i>BMI1 (R)</i>                                         | TTCAGTAGTGGTCTGGTCTTGT | 55.4 | 45.5 |
| <i>MBD3 (F)</i>                                         | CAGCCGGTGACCAAGATTACC  | 58   | 57.1 |
| <i>MBD3 (R)</i>                                         | CTCCTCAGCAATGTCGAAGG   | 55.5 | 55   |
| <i>GAPDH (F)</i>                                        | CTGGGCTACACTGAGCACC    | 58   | 63.2 |
| <i>GAPDH (R)</i>                                        | AAGTGGTCGTTGAGGGCAATG  | 58   | 52.4 |
| <i>GAPDH</i> : Glyceraldehyde-3-phosphate dehydrogenase |                        |      |      |

**Supplementary Table S8.** Source, catalog, and clone informations for commercial antibodies used in this study.

| <b>Antibodies</b> | <b>Company</b>                           | <b>Catalog Number</b> | <b>Host Species</b> |
|-------------------|------------------------------------------|-----------------------|---------------------|
| CD133             | Life Technologies, Carlsbad, CA          | MA5-18323             | Mouse               |
| CD44              | Novous Biologicals, Littleton, CO        | NBP1-31488            | Rabbit              |
| CXCR4             | Thermo Scientific, Rockford, IL          | PA3-305               | Rabbit              |
| MBD3              | Cell Signaling Technology, Beverly, MA   | 99169S                | Rabbit              |
| $\alpha$ -tubulin | Santa Cruz Biotechnology, Santa Cruz, CA | sc-398103             | Mouse               |
| HA (12CA5)        | Santa Cruz Biotechnology, Santa Cruz, CA | sc-57592              | Mouse               |
| HA (C29F4)        | Cell Signaling Technology, Beverly,      | 3724S                 | Rabbit              |

|                                                   |                                             |             |             |
|---------------------------------------------------|---------------------------------------------|-------------|-------------|
|                                                   | MA                                          |             |             |
| Flag                                              | Sigma, St. Louis, MO                        | SAB4301135  | Mouse       |
| Myc-tag                                           | Cell Signaling Technology                   | 2276S       | Mouse       |
| $\beta$ -TrCP                                     | Cell Signaling Technology, Beverly,<br>MA   | 11984S      | Rabbit      |
| phosphoserine (PSR-45)                            | Abcam Inc., Cambridge, MA                   | ab6639      | Mouse       |
| CK1 $\alpha$                                      | Novous Biologicals, Littleton, CO           | NBP1-18880  | Rabbit      |
| Nestin                                            | Abcam Inc., Cambridge, MA                   | ab22035     | Mouse       |
| Ki67                                              | Sigma, St. Louis, MO                        | SAB5600249  | Rabbit      |
| IgG                                               | Abcam Inc., Cambridge, MA                   | ab171870    | Rabbit      |
| HDAC1                                             | Cell Signaling                              | 34589S      | Rabbit      |
| HDAC2                                             | Cell Signaling                              | 57156S      | Rabbit      |
| MTA1                                              | Cell Signaling                              | 5647S       | Rabbit      |
| Histone H3 (acetyl K27)                           | Abcam Inc., Cambridge, MA                   | ab4729      | Rabbit      |
| Histone H3 (acetyl K9 +<br>K14 + K18 + K23 + K27) | Abcam Inc., Cambridge, MA                   | ab47915     | Rabbit      |
| RbAP46 (V415)                                     | Cell Signaling                              | 6882        | Rabbit      |
| MBD2                                              | Santa Cruz Biotechnology, Santa<br>Cruz, CA | sc-514062   | Mouse       |
| MGMT                                              | Novous Biologicals, Littleton, CO           | NBP2-68885  | Rabbit      |
| $\beta$ -Tubulin III                              | Covance, Princeton, NJ                      | MMS-435P    | Mouse       |
| GFAP                                              | Cell Signaling Technology                   | 12389S      | Rabbit      |
| FITC-CD44                                         | Miltenyi Biotec Inc., Auburn, CA            | 130-113-903 | Conjugation |
| CD44-APC, human (clone:<br>DB105)                 | Miltenyi Biotec Inc., Auburn, CA            | 130-113-893 | Conjugation |
| CD133/1 (AC133)-PE,<br>human (clone: AC133)       | Miltenyi Biotec Inc., Auburn, CA            | 130-108-062 | Conjugation |
| PEcy7-CXCR4 (clone:<br>12G5)                      | Biolegend, San Diego, CA                    | 306514      | Conjugation |
| anti-rabbit Alexa Fluor 488                       | Molecular Probes, Eugene, OR                | A27034      | Secondary   |
| anti-mouse Alexa Fluor 488                        | Molecular Probes, Eugene, OR                | A28175      | Secondary   |
| anti-rabbit Alexa Fluor 555                       | Molecular Probes, Eugene, OR                | A27039      | Secondary   |
| anti-mouse Alexa Fluor 555                        | Molecular Probes, Eugene, OR                | A28180      | Secondary   |

**Data set 1. mRNA** expression data of RNA sequencing consisting of GBM patient ( $n=20$ ) and adjacent normal ( $n=19$ ) brain tissues.
